1 **Comparing methods for detecting multilocus adaptation with multivariate genotype-**  
2 **environment associations**

3

4 Brenna R. Forester<sup>1,2</sup>, Jesse R. Lasky<sup>3</sup>, Helene H. Wagner<sup>4</sup>, Dean L. Urban<sup>1</sup>

5

6 1 – Duke University, Nicholas School of the Environment, Durham, NC 27708, USA.

7 2 – Current location: Colorado State University, Department of Biology, Fort Collins, CO 80523,

8 USA.

9 3 – Pennsylvania State University, Department of Biology, University Park, PA 16802, USA.

10 4 – University of Toronto Mississauga, Department of Biology, Mississauga, ON, Canada

11

12 *Keywords:* constrained ordination, landscape genomics, natural selection, random forest,  
13 redundancy analysis, simulations

14

15 *Corresponding Author:* Brenna R. Forester, Colorado State University, Department of Biology,  
16 1878 Campus Delivery, Fort Collins, CO 80523, Phone: (970) 491-7011, Fax: (970) 491-0649,  
17 Email: [brenna.forester@colostate.edu](mailto:brenna.forester@colostate.edu)

18

19 *Running title:* Detecting multilocus adaptation

20 **Abstract**

21 Identifying adaptive loci can provide insight into the mechanisms underlying local adaptation.  
22 Genotype-environment association (GEA) methods, which identify these loci based on  
23 correlations between genetic and environmental data, are particularly promising. Univariate  
24 methods have dominated GEA, despite the high dimensional nature of genotype and  
25 environment. Multivariate methods, which analyze many loci simultaneously, may be better  
26 suited to these data since they consider how sets of markers covary in response to environment.  
27 These methods may also be more effective at detecting adaptive processes that result in weak,  
28 multilocus signatures. Here, we evaluate four multivariate methods, and five univariate and  
29 differentiation-based approaches, using published simulations of multilocus selection. We found  
30 that Random Forest performed poorly for GEA. Univariate GEAs performed better, but had low  
31 detection rates for loci under weak selection. Constrained ordinations showed a superior  
32 combination of low false positive and high true positive rates across all levels of selection. These  
33 results were robust across the demographic histories, sampling designs, sample sizes, and levels  
34 of population structure tested. The value of combining detections from different methods was  
35 variable, and depended on study goals and knowledge of the drivers of selection. Reanalysis of  
36 genomic data from gray wolves highlighted the unique, covarying sets of adaptive loci that could  
37 be identified using redundancy analysis, a constrained ordination. Although additional testing is  
38 needed, this study indicates that constrained ordinations are an effective means of detecting  
39 adaptation, including signatures of weak, multilocus selection, providing a powerful tool for  
40 investigating the genetic basis of local adaptation.

## 41 **Introduction**

42 Analyzing genomic data for loci underlying local adaptation has become common practice in  
43 evolutionary and ecological studies (Hoban *et al.*, 2016). These analyses can help identify  
44 mechanisms of local adaptation and inform management decisions for agricultural, natural  
45 resources, and conservation applications. Genotype-environment association (GEA) approaches  
46 are particularly promising for detecting these loci (Rellstab *et al.* 2015). Unlike differentiation  
47 outlier methods, which identify loci with strong allele frequency differences among populations,  
48 GEA approaches identify adaptive loci based on associations between genetic data and  
49 environmental variables hypothesized to drive selection. Benefits of GEA include the option of  
50 using individual-based (as opposed to population-based) sampling and the ability to make  
51 explicit links to the ecology of organisms by including relevant predictors. The inclusion of  
52 predictors can also improve power and allows for the detection of selective events that do not  
53 produce high genetic differentiation among populations (De Mita *et al.*, 2013; de Villemereuil *et*  
54 *al.*, 2014; Rellstab *et al.*, 2015).

55 Univariate statistical methods have dominated GEA since their first appearance (Mitton  
56 *et al.*, 1977). These methods test one locus and one predictor variable at a time, and include  
57 generalized linear models (e.g. Joost *et al.* 2007; Stucki *et al.* 2016), variations on linear mixed  
58 effects models (e.g. Coop *et al.* 2010; Frichot *et al.* 2013; Yoder *et al.* 2014; Lasky *et al.* 2014),  
59 and non-parametric approaches (e.g. partial Mantel, Hancock *et al.* 2011). While these methods  
60 perform well, they can produce elevated false positive rates in the absence of correction for  
61 multiple comparisons, an issue of increased importance with large genomic data sets. Corrections  
62 such as Bonferroni can be overly conservative (potentially removing true positive detections),  
63 while alternative correction methods, such as false discovery rate (FDR, Benjamini & Hochberg  
64 1995), rely on an assumption of a null distribution of  $p$ -values, which may often be violated for  
65 empirical data sets. While these issues should not discourage the use of univariate methods  
66 (though corrections should be chosen carefully, see François *et al.* (2016) for a recent overview),  
67 other analytical approaches may be better suited to the high dimensionality of modern genomic  
68 data sets.

69 In particular, multivariate approaches, which analyze many loci simultaneously, are well  
70 suited to data sets comprising hundreds of individuals sampled at many thousands of genetic

71 markers. Compared to univariate methods, these approaches are thought to more effectively  
72 detect multilocus selection since they consider how groups of markers covary in response to  
73 environmental predictors (Rellstab et al. 2015). This is important because many adaptive  
74 processes are expected to result in weak, multilocus molecular signatures due to selection on  
75 standing genetic variation, recent/contemporary selection that has not yet led to allele fixation,  
76 and conditional neutrality (Yeaman & Whitlock, 2011; Le Corre & Kremer, 2012; Savolainen *et*  
77 *al.*, 2013; Tiffin & Ross-Ibarra, 2014). Identifying the relevant patterns (e.g., coordinated shifts  
78 in allele frequencies across many loci) that underlie these adaptive processes is essential to both  
79 improving our understanding of the genetic basis of local adaptation, and advancing applications  
80 of these data for management, such as conserving the evolutionary potential of species  
81 (Savolainen *et al.*, 2013; Harrison *et al.*, 2014; Lasky *et al.*, 2015). While multivariate methods  
82 may, in principle, be better suited to detecting these shared patterns of response, they have not  
83 yet been tested on common data sets simulating multilocus adaptation, limiting confidence in  
84 their effectiveness on empirical data.

85 Here we evaluate a set of these methods, using published simulations of multilocus  
86 selection (Lotterhos & Whitlock, 2014, 2015). We compare power using empirical  $p$ -values, and  
87 evaluate false positive rates based on cutoffs used in empirical studies. We follow up with a test  
88 of three of these methods on their ability to detect weak multilocus selection, as well as an  
89 assessment of the common practice of combining detections across multiple tests. We investigate  
90 the effects of correction for population structure in one ordination method, and follow up with an  
91 application of this test to an empirical data set from gray wolves. We find that the constrained  
92 ordinations we tested maintain the best balance of true and false positive rates across a range of  
93 demographics, sampling designs, sample sizes, and selection levels, and can provide unique  
94 insight into the processes driving selection and the multilocus architecture of local adaptation.

95

## 96 **Methods**

### 97 Multivariate approaches to GEA:

98 Multivariate statistical techniques, including ordinations such as principal components analysis  
99 (PCA), have been used to analyze genetic data for over fifty years (Cavalli-Sforza, 1966).

100 Indirect ordinations like PCA (which do not use predictors) use patterns of association within

101 genetic data to find orthogonal axes that fully decompose the genetic variance. Constrained  
102 ordinations extend this analysis by restricting these axes to combinations of supplied predictors  
103 (Jombart *et al.*, 2009; Legendre & Legendre, 2012). When used as a GEA, a constrained  
104 ordination is essentially finding orthogonal sets of loci that covary with orthogonal multivariate  
105 environmental patterns. By contrast, a univariate GEA is testing for single locus relationships  
106 with single environmental predictors. The use of constrained ordinations in GEA goes back as  
107 far as Mulley *et al.* (1979), with more recent applications to genomic data sets in Lasky *et al.*  
108 (2012), Forester *et al.* (2016), and Brauer *et al.* (2016). In this analysis, we test two promising  
109 constrained ordinations, redundancy analysis (RDA) and distance-based redundancy analysis  
110 (dbRDA). We also test an extension of RDA that uses a preliminary step of summarizing the  
111 genetic data into sets of covarying markers (Bourret *et al.*, 2014). We do not include canonical  
112 correspondence analysis, a constrained ordination that is best suited to modeling unimodal  
113 responses, although this method has been used to analyze microsatellite data sets (e.g. Angers *et*  
114 *al.* 1999; Grivet *et al.* 2008).

115 Random Forest (RF) is a machine learning algorithm that is designed to identify structure  
116 in complex data and generate accurate predictive models. It is based on classification and  
117 regression trees (CART), which recursively partition data into response groups based on splits in  
118 predictors variables. CART models can capture interactions, contingencies, and nonlinear  
119 relationships among variables, differentiating them from linear models (De'ath & Fabricius,  
120 2000). RF reduces some of the problems associated with CART models (e.g. overfitting and  
121 instability) by building a “forest” of classification or regression trees with two layers of  
122 stochasticity: random bootstrap sampling of the data, and random subsetting of predictors at each  
123 node (Breiman, 2001). This provides a built-in assessment of predictive accuracy (based on data  
124 left out of the bootstrap sample) and variable importance (based on the change in accuracy when  
125 covariates are permuted). For GEA, variable importance is the focal statistic, where the predictor  
126 variables used at each split in the tree are molecular markers, and the goal is to sort individuals  
127 into groups based on an environmental category (classification) or to predict home  
128 environmental conditions (regression). Markers with high variable importance are best able to  
129 sort individuals or predict environments. RF has been used in a number of recent GEA and

130 GWAS studies (e.g. Holliday et al. 2012; Briec et al. 2015; Pavey et al. 2015; Laporte et al.  
131 2016), but has not yet been tested in a GEA simulation framework.

132 We compare these multivariate methods to the two differentiation-based and three  
133 univariate GEA methods tested by Lotterhos & Whitlock (2015): the  $X^T X$  statistic from Bayenv2  
134 (Günther & Coop, 2013), PCAdapt (Duforet-Frebourg *et al.*, 2014), latent factor mixed models  
135 (LFMM, Frichot *et al.* 2013), and two GEA-based statistics (Bayes factors and Spearman's  $\rho$ )  
136 from Bayenv2. We also include generalized linear models (GLM), a regression-based GEA that  
137 does not use a correction for population structure.

138

139 GEA implementation:

140 *Constrained ordinations:*

141 We tested RDA and dbRDA as implemented by Forester et al. (2016). RDA is a two-step process  
142 in which genetic and environmental data are analyzed using multivariate linear regression,  
143 producing a matrix of fitted values. Then PCA of the fitted values is used to produce canonical  
144 axes, which are linear combinations of the predictors. We centered and scaled genotypes for  
145 RDA (i.e., mean = 0, s = 1; see Jombart *et al.* 2009 for a discussion of scaling genetic data for  
146 ordinations). Distance-based redundancy analysis is similar to RDA but allows for the use of  
147 non-Euclidian dissimilarity indices. Whereas RDA can be loosely considered as a PCA  
148 constrained by predictors, dbRDA is analogous to a constrained principal coordinate analysis  
149 (PCoA, or a PCA on a non-Euclidean dissimilarity matrix). For dbRDA, we calculated the  
150 distance matrix using Bray-Curtis dissimilarity (Bray & Curtis, 1957), which quantifies the  
151 dissimilarity among individuals based on their multilocus genotypes (equivalent to one minus the  
152 proportion of shared alleles between individuals). For both methods, SNPs are modeled as a  
153 function of predictor variables, producing as many constrained axes as predictors. We identified  
154 outlier loci on the constrained ordination axes based on the “locus score”, which represent the  
155 coordinates/loading of each locus in the ordination space. We use *rda* for RDA and *capscale* for  
156 dbRDA in the *vegan*, v. 2.3-5 package (Oksanen *et al.*, 2013) in R v. 3.2.5 (R Development Core  
157 Team, 2015) for this and all subsequent analyses.

158 *Redundancy analysis of components:*

159 This method, described by Bourret *et al.* (2014), differs from the approaches described above in  
160 using a preliminary step that summarizes the genotypes into sets of covarying markers, which are  
161 then used as the response in RDA. The idea is to identify from these sets of covarying loci only  
162 the groups that are most strongly correlated with environmental predictors. We began by  
163 ordinating SNPs into principal components (PCs) using *prcomp* in R on the scaled data,  
164 producing as many axes as individuals. Following Bourret *et al.* (2014), we used parallel analysis  
165 (Horn, 1965) to determine how many PCs to retain. Parallel analysis is a Monte Carlo approach  
166 in which the eigenvalues of the observed components are compared to eigenvalues from  
167 simulated data sets that have the same size as the original data. We used 1,000 random data sets  
168 to generate the distribution under the null hypothesis and retained components with eigenvalues  
169 greater than the 99<sup>th</sup> percentile of the eigenvalues of the simulated data (i.e., a significance level  
170 of 0.01), using the *hornpa* package, v. 1.0 (Huang, 2015).

171 Next, we applied a varimax rotation to the PC axes, which maximizes the correlation  
172 between the axes and the original variables (in this case, the SNPs). Note that once a rotation is  
173 applied to the PC axes, they are no longer “principal” components (i.e. axes associated with an  
174 eigenvalue/variance), but simply components. We then used the retained components as  
175 dependent variables in RDA, with environmental variables used as predictors. Next, components  
176 that were significantly correlated with the constrained axis were retained. Significance was based  
177 on a cutoff ( $\alpha = 0.05$ ) corrected for sample sizes using a Fisher transformation as in Bourret  
178 *et al.* (2014). Finally, SNPs were correlated with these retained components to determine  
179 outliers. We call this approach redundancy analysis of components (cRDA).

180

181 *Random Forest:*

182 The Random Forest approach implemented here builds off of work by Goldstein *et al.* (2010),  
183 Holliday *et al.* (2012), and Briec *et al.* (2015). This three-step approach is implemented  
184 separately for each predictor variable. The environmental variable used in this study was  
185 continuous, so RF models were built as regression trees. For categorical predictors (e.g. soil  
186 type) classification trees would be used, which require a different parameterization (important  
187 recommendations for this case are provided in Goldstein *et al.* 2010).

188 First, we tuned the two main RF parameters, the number of trees (*ntrees*) and the number  
189 of predictors sampled per node (*mtry*). We tested a range of values for *ntrees* in a subset of the  
190 simulations, and found that 10,000 trees were sufficient to stabilize variable importance (note  
191 that variable importance requires a larger number of trees for convergence than error rates,  
192 Goldstein et al. 2010). We used the default value of *mtry* for regression (number of predictors/3,  
193 equivalent to ~3,330 SNPs in this case) after checking that increasing *mtry* did not substantially  
194 change variable importance or the percent variance explained. In a GEA/GWAS context, larger  
195 values of *mtry* reduce error rates, improve variable importance estimates, and lead to greater  
196 model stability (Goldstein *et al.* 2010).

197 Because RF is a stochastic algorithm, it is best to use multiple runs, particularly when  
198 variable importance is the parameter of interest (Goldstein *et al.*, 2010). We begin by building  
199 three full RF models using all SNPs as predictors, saving variable importance as mean decrease  
200 in accuracy for each model. Next, we sampled variable importance from each run with a range of  
201 cutoffs, pulling the most important 0.5%, 1.0%, 1.5%, and 2.0% of loci. These values correspond  
202 to approximately 50/100/150/200 loci that have the highest variable importance. For each cutoff,  
203 we then created three additional RF models, using the average percent variance explained across  
204 runs to determine the best starting number of important loci for step 3. This step removes clearly  
205 unimportant loci from further consideration (i.e. “sparsity pruning”, Goldstein et al. 2010).

206 Third, we doubled the best starting number of loci from step 2; this is meant to  
207 accommodate loci that may have low marginal effects (Goldstein et al. 2010). We then built  
208 three RF models with these loci, and recorded the mean variance explained. We removed the  
209 least important locus in each model, and recalculated the RF models and mean variance  
210 explained. This procedure continues until two loci remain. The set of loci that explain the most  
211 variance are the final candidates. Candidates are then combined across runs to identify outliers.

212

### 213 *Differentiation-based and univariate GEA methods:*

214 For the two differentiation-based and the Bayenv2-based GEA methods, we compared power  
215 directly from the results provided in Lotterhos & Whitlock (2015). PCAdapt is a differentiation-  
216 based method that concurrently identifies outlier loci and population structure using latent factors  
217 (Duforet-Frebourg *et al.*, 2014). The  $X^T X$  statistic from Bayenv2 (Günther & Coop, 2013) is an



218 F<sub>ST</sub> analog that uses a covariance matrix to control for population structure. The two Bayenv2  
219 GEA statistics (Bayes factors and Spearman's  $\rho$ ) also use the covariance matrix to control for  
220 population structure, while identifying candidate loci based on log-transformed Bayes factors  
221 and nonparametric correlations, respectively. Details on these methods and their implementation  
222 are provided in Lotterhos & Whitlock (2015).

223 We reran latent factor mixed models, a GEA approach that controls for population  
224 structure using latent factors, using updated parameters as recommended by the authors (O.  
225 François, pers. comm.). We tested values of  $K$  (the number of latent factors) ranging from one to  
226 25 using a sparse nonnegative matrix factorization algorithm (Frichot *et al.*, 2014), implemented  
227 as function *snmf* in the package LEA, v. 1.2.0 (Frichot & François, 2015). We plotted the cross-  
228 entropy values and selected  $K$  based on the inflection point in these plots; when the inflection  
229 point was not clear, we used the value where additional cross-entropy loss was minimal. We  
230 parameterized LFMM models with this best estimate of  $K$ , and ran each model ten times with  
231 5,000 iterations and a burnin of 2,500. We used the median of the squared z-scores to rank loci  
232 and calculate a genomic inflation factor (GIF) to assess model fit (Frichot & François, 2015;  
233 François *et al.*, 2016). The GIF is used to correct for inflation of z-scores at each locus, which  
234 can occur when population structure or other confounding factors are not sufficiently accounted  
235 for in the model (François *et al.* 2016). The GIF is calculated by dividing the median of the  
236 squared z-scores by the median of the chi-squared distribution. We used the LEA and qvalue, v.  
237 2.2.2 (Storey *et al.*, 2015) packages in R. Full  $K$  and GIF results are presented in Table S1.  
238 Finally, we ran generalized linear models (GLM) on individual allele counts using a binomial  
239 family and logistic link function for comparison with LFMM; GIF results are presented in Table  
240 S1.

241

#### 242 Simulations:

243 We used a subset of simulations published by Lotterhos & Whitlock (2014, 2015). Briefly, four  
244 demographic histories are represented in these data, each with three replicated environmental  
245 surfaces (Fig. S1): an equilibrium island model (IM), equilibrium isolation by distance (IBD),  
246 and nonequilibrium isolation by distance with expansion from one (1R) or two (2R) refugia. In  
247 all cases, demography was independent of selection strength, which is analogous to simulating

248 soft selection (Lotterhos & Whitlock, 2014). Haploid, biallelic SNPs were simulated  
249 independently, with 9,900 neutral loci and 100 under selection. Note that haploid SNPs will yield  
250 half the information content of diploid SNPs (Lotterhos & Whitlock 2015). The mean of the  
251 environmental/habitat parameter had a selection coefficient equal to zero and represented the  
252 background across which selective habitat was patchily distributed (Fig. S1). Selection  
253 coefficients represent a proportional increase in fitness of alleles in response to habitat, where  
254 selection is increasingly positive as the environmental value increases from the mean, and  
255 increasingly negative as the value decreases from the mean (Lotterhos & Whitlock 2014, Fig.  
256 S1). This landscape emulates a weak cline, with a north-south trend in the selection surface. Of  
257 the 100 adaptive loci, most were under weak selection. For the IBD scenarios, selection  
258 coefficients were 0.001 for 40 loci, 0.005 for 30 loci, 0.01 for 20 loci, and 0.1 for 10 loci. For the  
259 1R, 2R, and IM scenario, selection coefficients were 0.005 for 50 loci, 0.01 for 33 loci, and 0.1  
260 for 17 loci. Note that realized selection varied across demographies, so results across  
261 demographic histories are not directly comparable (Lotterhos & Whitlock 2015).

262 We used the following sampling strategies and sample sizes from Lotterhos & Whitlock  
263 (2015): random, paired, and transect strategies, with 90 demes sampled, and 6 or 20 individuals  
264 sampled per deme. Paired samples (45 pairs) were designed to maximize environmental  
265 differences between locations while minimizing geographic distance; transects (nine transects  
266 with ten locations) were designed to maximize environmental differences at transect ends  
267 (Lotterhos & Whitlock 2015). Overall, we used 72 simulations for testing. We assessed trend in  
268 neutral loci using linear models of allele frequencies within demes as a function of coordinates.  
269 We evaluated the strength of local adaptation using linear models of allele frequencies within  
270 demes as a function of environment. Note that the Lotterhos & Whitlock (2014, 2015)  
271 simulations assigned SNP genotypes to individuals within a population sequentially (i.e., the first  
272 few individuals would all get the same allele until its target frequency was reached, the  
273 remaining individuals would get the other allele). This creates artifacts (e.g., artificially low  
274 observed heterozygosity) and may affect statistical error rates when subsampling individuals or  
275 performing analyses at the individual level. As recommended by K. Lotterhos (pers. comm.), we  
276 avoided these problems by randomizing allele counts for each SNP among individuals within

277 each population. The habitat surface, which imposed a continuous selective gradient on non-  
278 neutral loci, was used as the environmental predictor.

279

#### 280 Evaluation statistics:

281 In order to equitably compare power (true positive detections out of the number of loci under  
282 selection) across these methods, we calculated empirical  $p$ -values using the method of Lotterhos  
283 & Whitlock (2015). In this approach, we first built a null distribution based on the test statistics  
284 of all neutral loci, and then generated a  $p$ -value for each selected locus based on its cumulative  
285 frequency in the null distribution. We then converted empirical  $p$ -values to  $q$ -values to assess  
286 significance, using the same  $q$ -value cutoff (0.01) as Lotterhos & Whitlock (2015). We used  
287 code provided by K. Lotterhos to calculate empirical  $p$ -values (code provided in Supplemental  
288 Information).

289 Because false positive rates (FPRs) are not very informative for empirical  $p$ -values (rates  
290 are universally low, see Lotterhos & Whitlock 2015 for a discussion), we applied cutoffs (e.g.  
291 thresholds for statistical significance) to assess both true and false positive rates across methods.  
292 While power is important, determining FPRs is also an essential component of assessing method  
293 performance, since high power achieved at the cost of high FPRs is problematic. Because cutoffs  
294 differ across methods, we tested a range of commonly used thresholds for each method and  
295 chose the approach that performed the best (i.e., best balance of TPR and FPR). Note that cutoffs  
296 can be adjusted for empirical studies based on research goals and the tolerance for TP and FP  
297 detections. For each cutoff tested, we calculated the TPR as the number of correct positive  
298 detections out of the number possible, and the FPR as the number of incorrect positive detections  
299 out of 9900 possible. For the main text, we present results from the best cutoff for each method;  
300 full results for all cutoffs tested are presented in the Supplemental Information. For constrained  
301 ordinations (RDA and dbRDA) we identified outliers as SNPs with a locus score  $\pm 2.5$  and 3  
302 SD from the mean score of each constrained axis. For cRDA, we used cutoffs for SNP-  
303 component correlations of  $\alpha = 0.05, 0.01, \text{ and } 0.001$ , corrected for sample sizes using a  
304 Fisher transformation as in Bourret et al. (2014). For GLM and LFMM, we compared two  
305 Bonferroni-corrected cutoffs (0.05 and 0.01) and a FDR cutoff of 0.1.

306 Weak selection:

307 We compared the best-performing multivariate methods (RDA, dbRDA, and cRDA) for their  
308 ability to detect signals of weak selection ( $s = 0.005$  and  $s = 0.001$ ). All tests were performed as  
309 described above, after removing loci under strong ( $s = 0.1$ ) and moderate ( $s = 0.01$ ) selection  
310 from the simulation data sets. The number of loci under selection in these cases ranged from 43  
311 to 76.

312

313 Combining detections:

314 We compared the effects of combining detections (i.e., looking for overlap) using cutoff results  
315 from two of the best-performing methods, RDA and LFMM. We also included a scenario in  
316 which a second, uninformative predictor (the x-coordinate of each individual) is included in the  
317 RDA and LFMM tests. This predictor is analogous to including an environmental variable  
318 hypothesized to drive selection that covaries with longitude.

319

320 Correction for population structure in RDA:

321 To determine how explicit modeling of population structure affects the performance of the best-  
322 performing multivariate method, RDA, we accounted for population structure using three  
323 approaches: (1) partialling out significant spatial eigenvectors not correlated with the habitat  
324 predictor, (2) partialling out all significant spatial eigenvectors, and (3) partialling out ancestry  
325 coefficients. The spatial eigenvector procedure uses Moran eigenvector maps (MEM) as spatial  
326 predictors in a partial RDA. MEMs provide a decomposition of the spatial relationships among  
327 sampled locations based on a spatial weighting matrix (Dray *et al.*, 2006). We used spatial  
328 filtering to determine which MEMs to include in the partial analyses (Dray *et al.*, 2012). Briefly,  
329 this procedure begins by applying a principal coordinate analysis (PCoA) to the genetic distance  
330 matrix, which we calculated using Bray-Curtis dissimilarity. We used the broken-stick criterion  
331 (Legendre & Legendre, 2012) to determine how many genetic PCoA axes to retain. Retained  
332 axes were used as the response in a full RDA, where the predictors included all MEMs. Forward  
333 selection (Blanchet *et al.*, 2008) was used to reduce the number of MEMs, using the full RDA  
334 adjusted  $R^2$  statistic as the threshold. In the first approach, retained MEMs that were significantly  
335 correlated with environmental predictors were removed ( $\alpha = 0.05/\text{number of MEMs}$ ), and the

336 remaining set of significant MEMs were used as conditioning variables in RDA. Note that this  
337 approach will be liberal in removing MEMs correlated with environment. In the second  
338 approach, all significant MEMs were used as conditioning variables, the most conservative use  
339 of MEMs. We used the *spdep*, v. 0.6-9 (Bivand *et al.*, 2013) and *adespatial*, v. 0.0-7 (Dray *et al.*,  
340 2016) packages to calculate MEMs. For the third approach, we used individual ancestry  
341 coefficients as conditioning variables. We used function *snmf* in the LEA package to estimate  
342 individual ancestry coefficients, running five replicates using the best estimate of *K*, and  
343 extracting individual ancestry coefficients from the replicate with the lowest cross-entropy.

344

#### 345 Empirical data set:

346 To provide an example of the use and interpretation of RDA as a GEA, we reanalyzed data from  
347 94 North American gray wolves (*Canis lupus*) sampled across Canada and Alaska at 42,587  
348 SNPs (Schweizer *et al.*, 2016). These data show similar global population structure to the  
349 simulations analyzed here: wolf data  $F_{st} = 0.09$ ; average simulation  $F_{st} = 0.05$ . We reduced the  
350 number of environmental covariates originally used by Schweizer *et al.* (2016) from 12 to eight  
351 to minimize collinearity among them (e.g.,  $|r| < 0.7$ ). One predictor, land cover, was removed  
352 because the distribution of cover types was heavily skewed toward two of the ten types. Missing  
353 data levels were low (3.06%). Because RDA requires complete data frames, we imputed missing  
354 values by replacing them with the most common genotype across individuals. We identified  
355 candidate adaptive loci as SNPs loading  $\pm 3$  SD from the mean loading of significant RDA axes  
356 (significance determined by permutation,  $p < 0.05$ ). We then identified the covariate most  
357 strongly correlated with each candidate SNP (i.e., highest correlation coefficient), to group  
358 candidates by potential driving environmental variables. Annotated code for this example is  
359 provided in the Supplementary Information.

360 **Results**

361 Empirical  $p$ -value results:

362 Power across the three ordination techniques was comparable, while power for RF was relatively  
363 low (Fig. 1). Ordinations performed best in IBD, 1R, and 2R demographies, with the larger  
364 sample size improving power for the IM demography. Within ordination techniques, RDA and  
365 cRDA had slightly higher detection rates compared to dbRDA; subsequent comparisons are  
366 made using RDA results.

367       Except for a few cases in the IM demography, the power of RDA was generally higher  
368 than univariate GEAs (Fig. 2). Of the univariate methods, GLM had the highest overall power,  
369 while LFMM had reduced power for the IBD demography. Power from the Bayes Factor  
370 (Bayenv2) was generally lower than RDA across all demographies. Finally, RDA had overall  
371 higher power than the two differentiation-based methods (Fig. 3), with the exception of the IBD  
372 demography, where power was high for all methods.

373       Among the methods with the highest overall power, all performed well at detecting loci  
374 under strong selection (Fig. 4 and S2). Detection rates for loci under moderate and weak  
375 selection were highest for ordination methods, with RDA and cRDA having the overall highest  
376 detection rates. Detection of moderate and weakly selected loci was lower and more variable for  
377 univariate methods, especially LFMM, where detection was dependent on demography and  
378 sampling scheme.

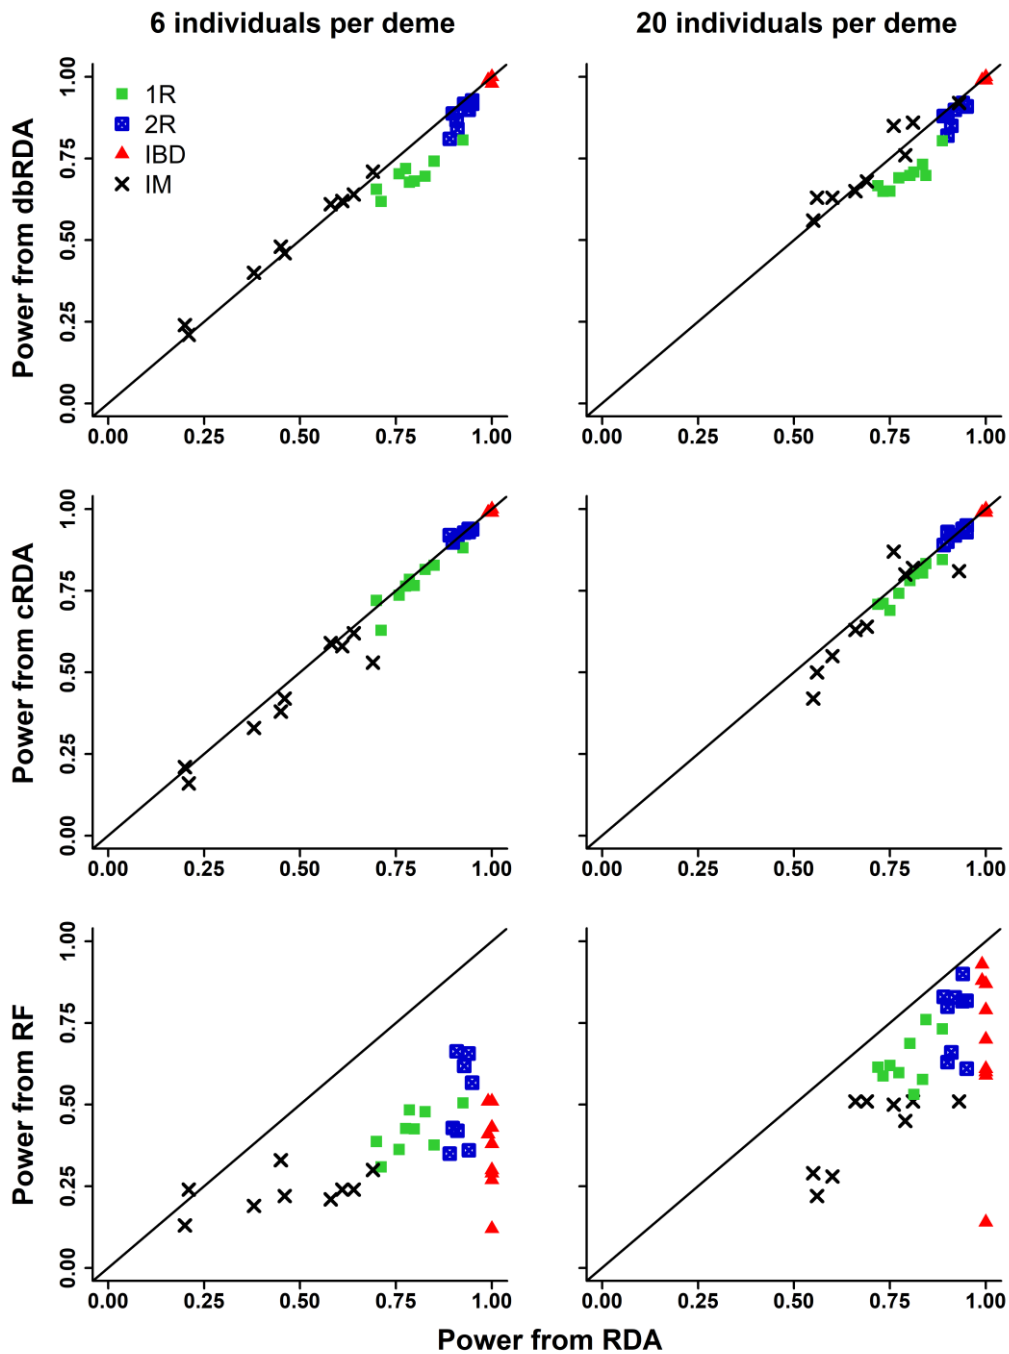

379

380 **Figure 1.** Comparison of power (from empirical  $p$ -values) from RDA (x-axis) and three other  
381 multivariate GEAs (y-axes, rows) for two sample sizes (columns). Points reflect demographies:  
382 1R and 2R = refugial expansion, IBD = equilibrium isolation by distance, IM = equilibrium  
383 island model. Some variation within demographies comes from sampling design.

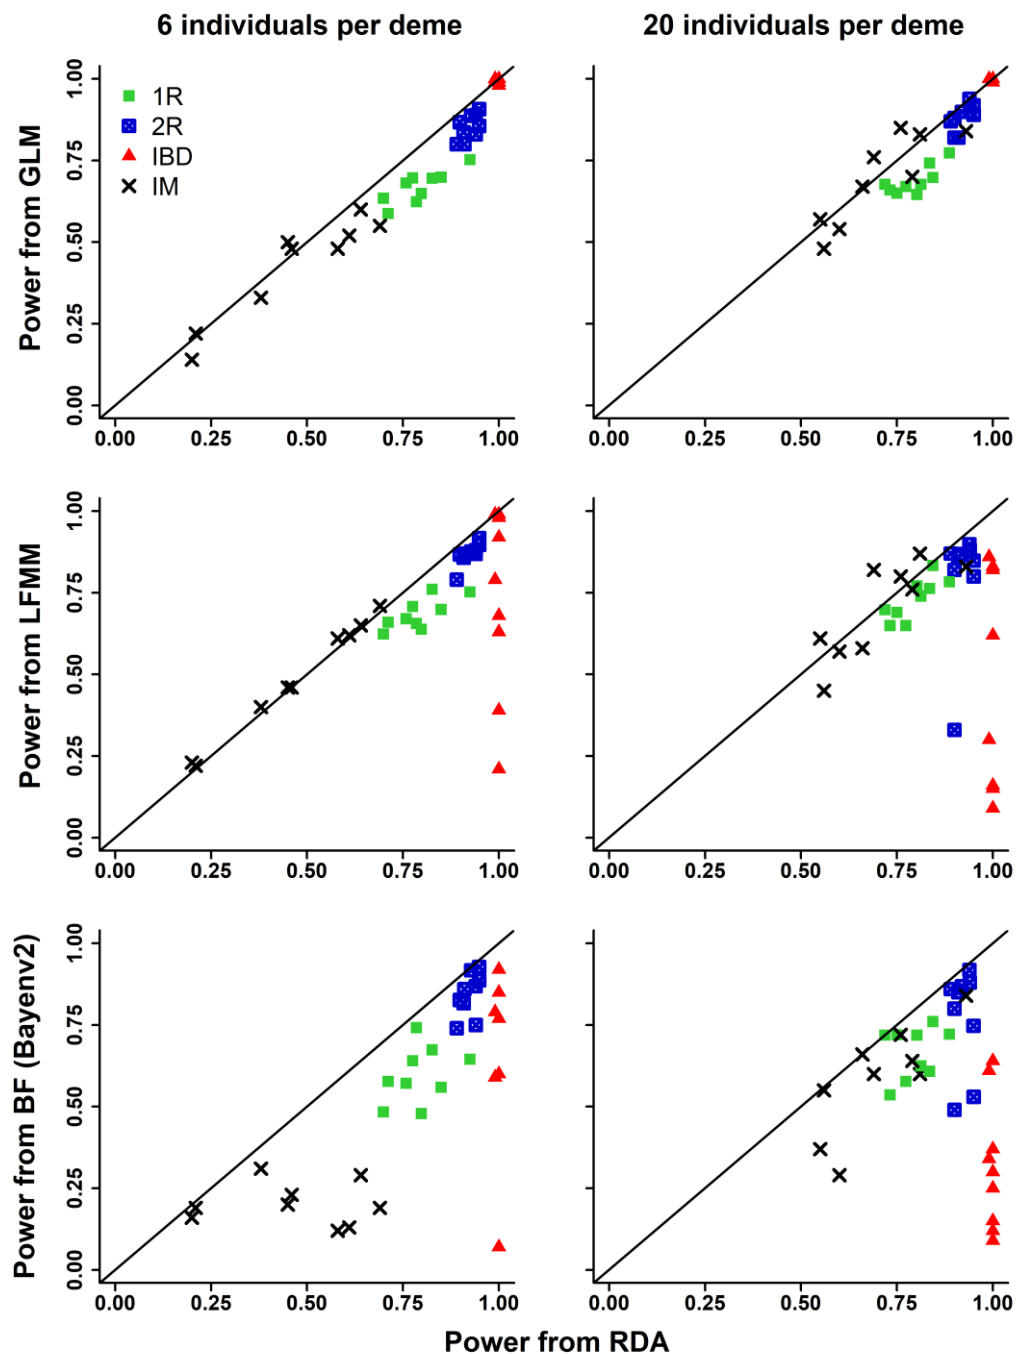

384

385 **Figure 2.** Comparison of power (from empirical  $p$ -values) from RDA (x-axis) and three  
386 univariate GEAs (y-axes, rows) for two sample sizes (columns). Points reflect demographics: 1R  
387 and 2R = refugial expansion, IBD = equilibrium isolation by distance, IM = equilibrium island  
388 model. Some variation within demographics comes from sampling design.



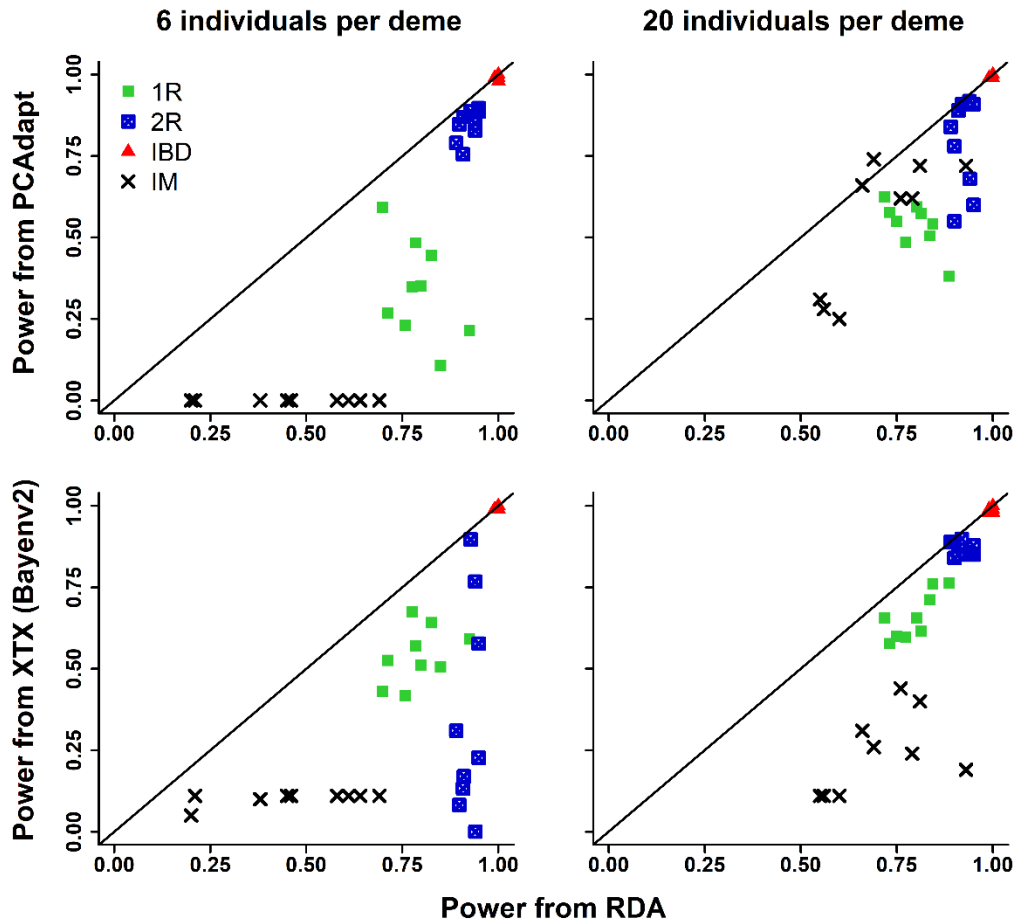

389

390 **Figure 3.** Comparison of power (from empirical  $p$ -values) from RDA (x-axis) and two  
391 differentiation-based outlier detection methods (y-axes, rows) for two sample sizes (columns).  
392 Points reflect demographics: 1R and 2R = refugial expansion, IBD = equilibrium isolation by  
393 distance, IM = equilibrium island model. Some variation within demographics comes from  
394 sampling design.

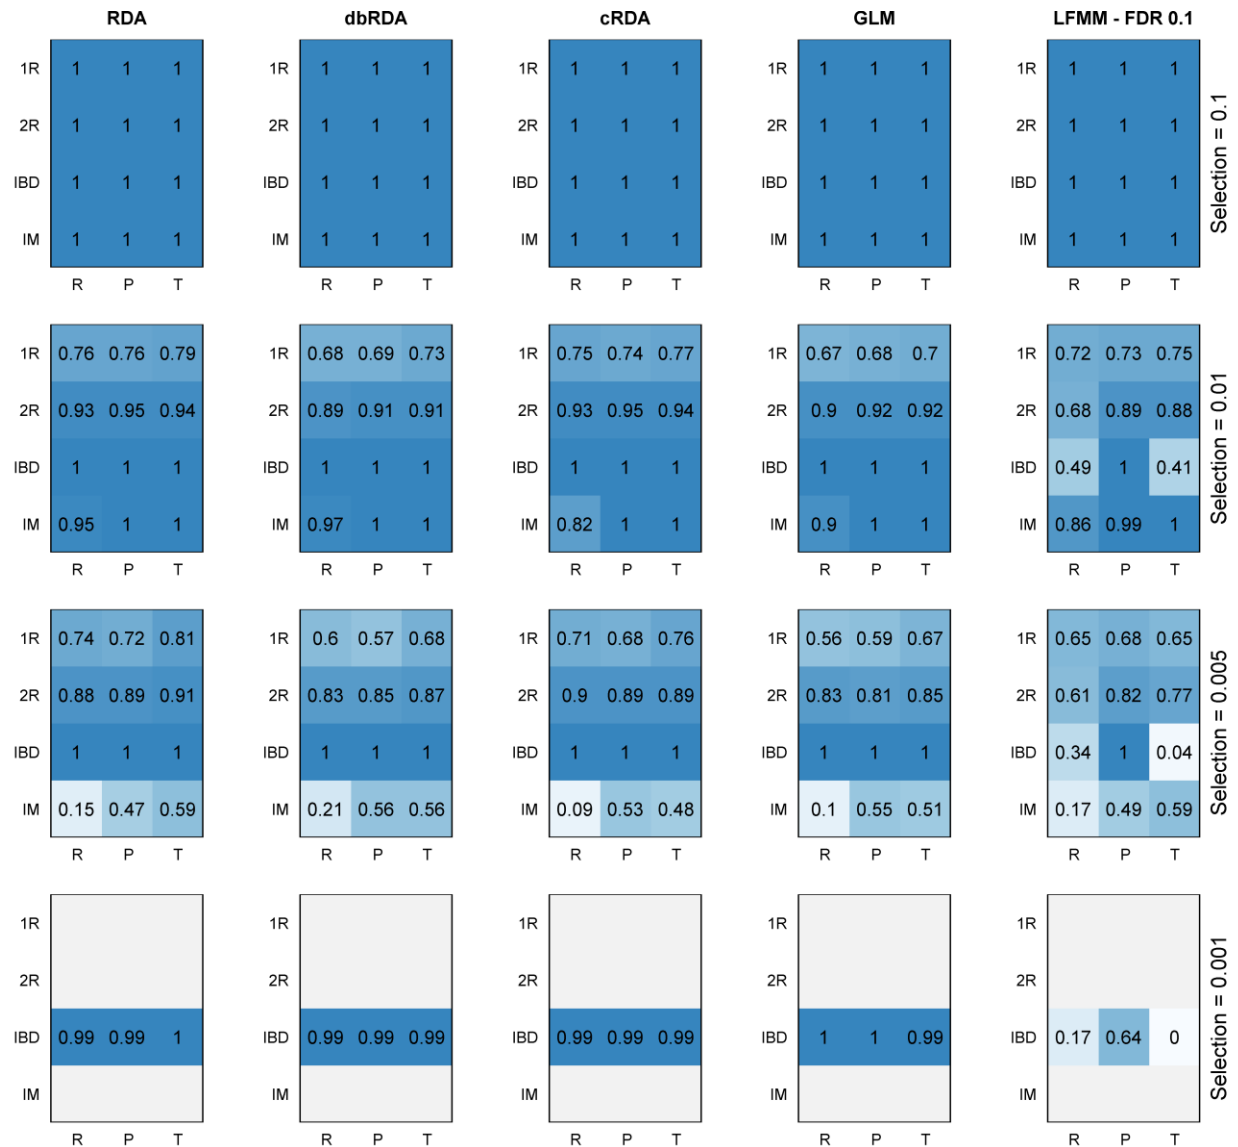

395

396 **Figure 4.** Average power (from empirical  $p$ -values) for different levels of selection (rows) from  
 397 five methods (columns) using a sample size of 20 individuals per deme. Each method shows  
 398 results for different sampling strategies (R = random, P = pairs, T = transects) and demographies  
 399 (1R and 2R = refugial expansion, IBD = equilibrium isolation by distance, IM = equilibrium  
 400 island model). Only the IBD demography included very weak selection ( $s=0.001$ ).

401 Weak selection:

402 We compared the three ordination methods for their power to detect only weak loci in the  
403 simulations (Fig. 5). Power from RDA was higher when all selected loci were included,  
404 especially for the IM demography. Power using only weakly selected loci was comparable  
405 between RDA and dbRDA, with power slightly higher for RDA in most cases. cRDA was  
406 comparable to RDA for the IBD and 2R demographies, but had very low to no power in the IM  
407 demography, and the 1R demography with the larger sample size.

408

409 Cutoff results:

410 We compared cutoff results for the methods with the highest overall power: RDA, dbRDA,  
411 cRDA, GLM, and LFMM. The best performing cutoffs were: RDA/dbRDA, +/- 3 SD; cRDA,  
412 alpha = 0.001; GLM, Bonferroni = 0.05, and LFMM, FDR = 0.1. We did not choose the FDR  
413 cutoff for GLMs since GIFs indicated that the test  $p$ -values were not appropriately calibrated  
414 (i.e., GIFs > 1, Table S1). For some scenarios, LFMM GIFs were less than one (indicating a  
415 conservative correction for population structure, Table S1). We reran LFMM models with the  
416 best estimate of  $K$  minus one (i.e.,  $K-1$ ) to determine if a less conservative correction would  
417 influence LFMM results. Because there was no consistent improvement in power or TPR/FPRs  
418 using  $K-1$  (Tables S2-S3), all subsequent results refer to LFMM runs using the best estimate of  
419  $K$ .

420 Full cutoff results for each method are presented in the Supplementary Information (Fig.  
421 S3-S6). Cutoff FPRs were highest for cRDA and GLM (Fig. 6). By contrast, RDA and dbRDA  
422 had mostly zero FPRs, with slightly higher FPRs for LFMM. Within these three low-FPR  
423 methods, RDA maintained the highest TPRs, except in the IM demography, where LFMM  
424 maintained higher power. LFMM was more sensitive to sampling design than the other methods,  
425 with more variation in TPRs across designs.

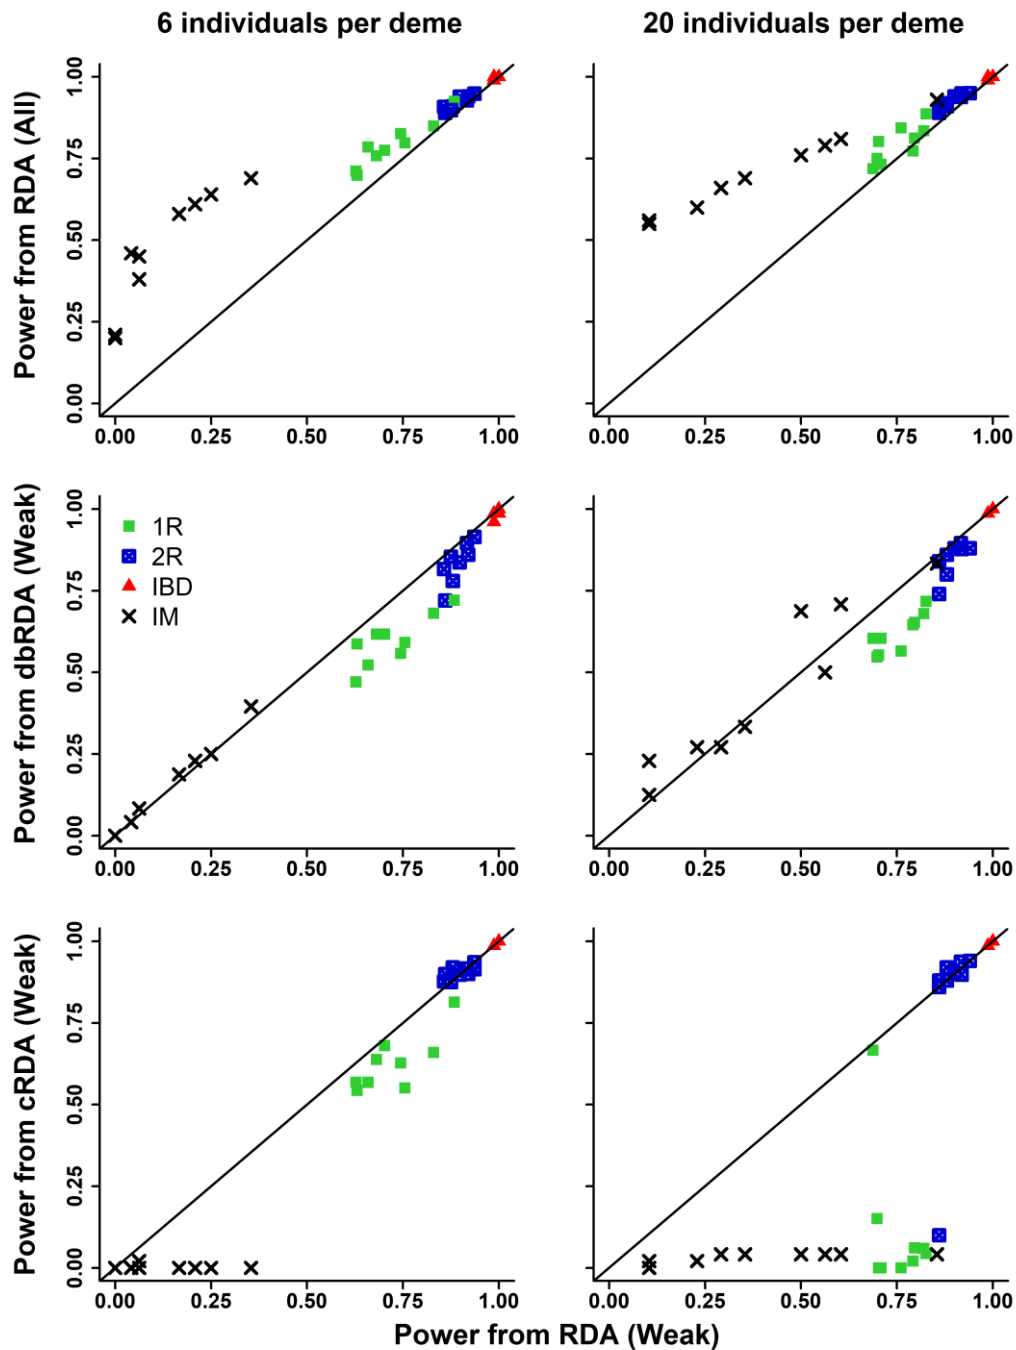

426

427 **Figure 5.** Comparison of power (from empirical  $p$ -values) from RDA tested on weak selection  
428 only (x-axis) and RDA tested on all loci under selection (first row), as well as dbRDA and cRDA  
429 tested on weak selection only (second and third rows) for two sample sizes (columns). Points  
430 reflect demographies: 1R and 2R = refugial expansion, IBD = equilibrium isolation by distance,  
431 IM = equilibrium island model. Some variation within demographies comes from sampling  
432 design.

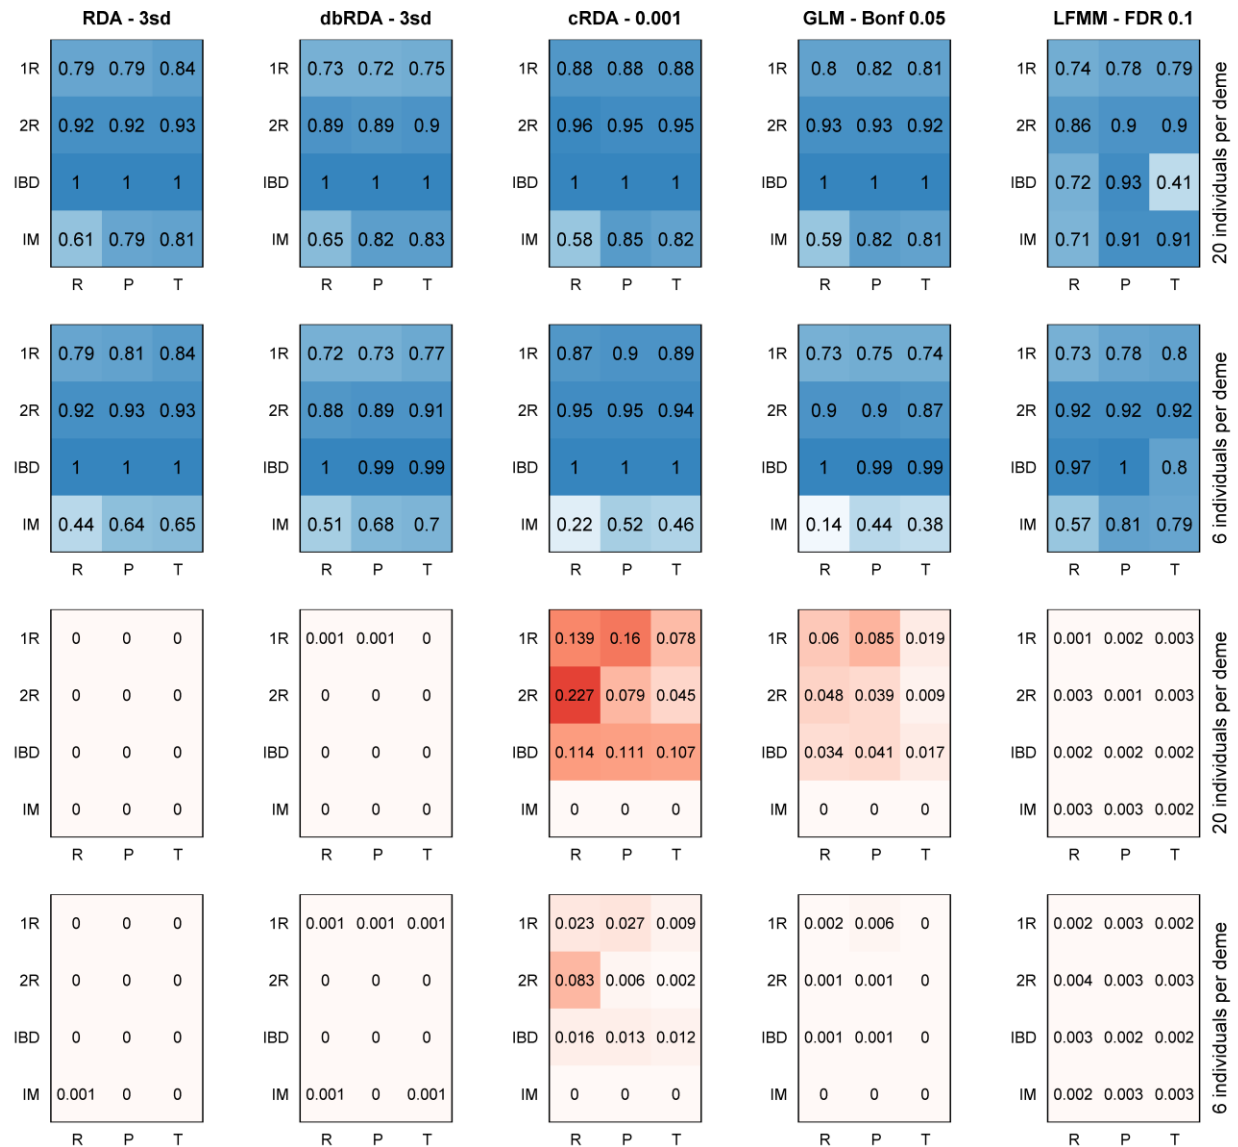

433  
434

435 **Figure 6.** Average true positive (top two rows, in blue) and false positive (bottom two rows, in  
436 red) rates from five methods (columns) using the best cutoff for each method. Each method  
437 shows results for different sampling strategies (R = random, P = pairs, T = transects),  
438 demographies (1R and 2R = refugial expansion, IBD = equilibrium isolation by distance, IM =  
439 equilibrium island model), and sample sizes (rows).

440 Combining detections:

441 We compared the univariate LFMM and multivariate RDA cutoff results for overlap and  
442 differences in their detections using both the habitat predictor only, and the habitat and  
443 (uninformative) x-coordinate predictor (Figs. 7 and S7). When the driving environmental  
444 predictor is known, RDA detections alone are the best choice, since FPRs are very low and RDA  
445 detects a large number of selected loci that are not identified by LFMM (except in the IM  
446 demography, Fig. 7a). However, when a noninformative environmental predictor is included,  
447 combining test results yields greater overall benefits, since the tests show substantial  
448 commonality in TP detections, but show very low commonality in FP detections (Fig. 7b). By  
449 retaining only overlapping loci, FPRs are substantially reduced at some loss of power due to  
450 discarded RDA (and LFMM in the IM demography) detections.

451

452 Correction for population structure in RDA:

453 No MEM-based corrections for RDA were applied to IM scenarios, due to low spatial structure  
454 (i.e., no PCoA axes were retained based on the broken-stick criterion). The more liberal approach  
455 to correction using MEMs (removing retained MEMs significantly correlated with environment),  
456 resulted in removal of MEMs with correlation coefficients ranging from 0.07 to 0.72. Ancestry-  
457 based corrections were only applied to IM scenarios with 20 individuals since 6 individual  
458 samples had  $K=1$ . All approaches that correct for population structure in RDA resulted in  
459 substantial loss of power across all scenarios, both in terms of empirical  $p$ -values and cutoff  
460 TPRs (Table 1 and Table S4). False positive rates (which were already very low for RDA)  
461 increased slightly when correcting for population structure. There were only two scenarios where  
462 FPRs improved (one and two fewer FP detections); however, these scenarios saw a reduction in  
463 TPR of 81% and 92%, respectively (Table S4).

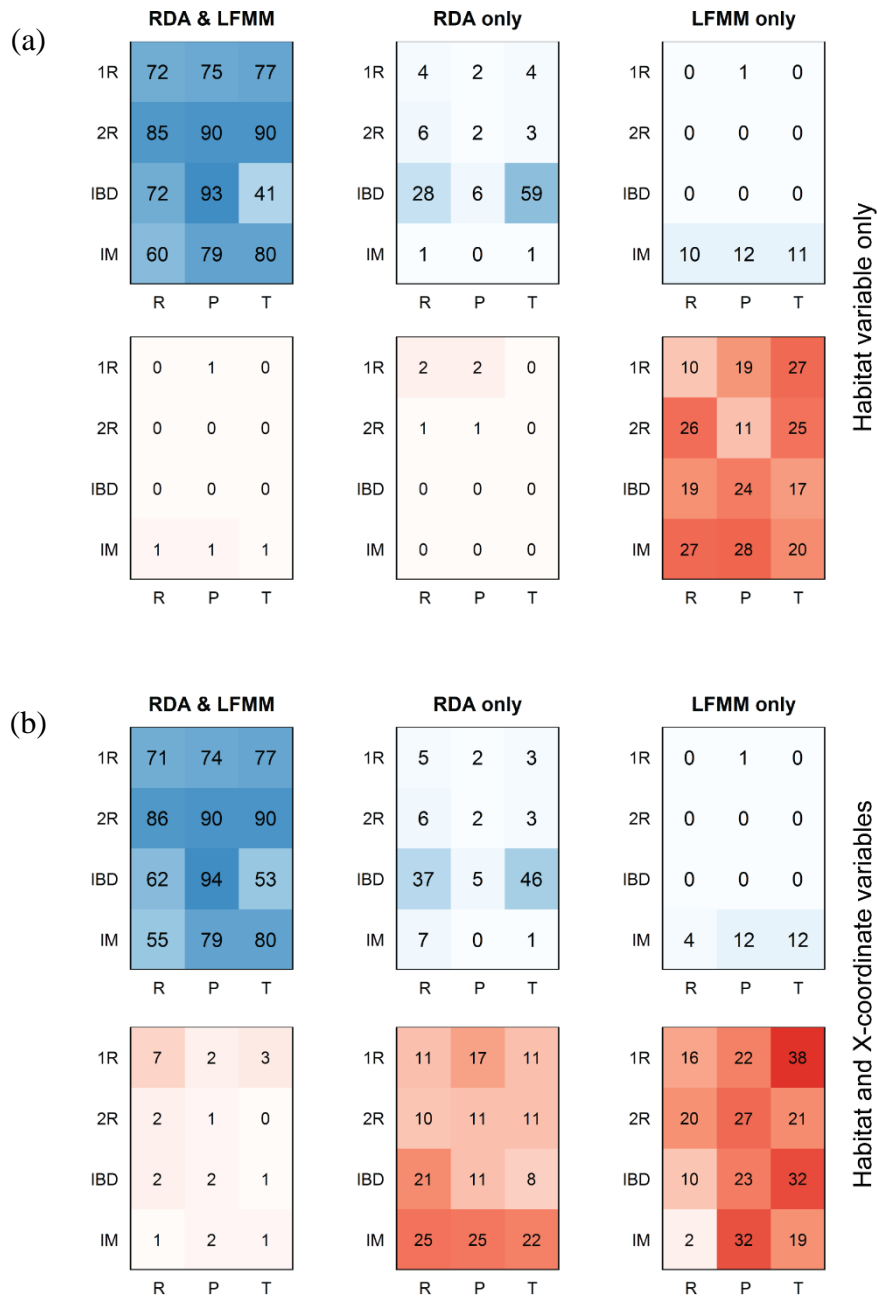

464  
 465 **Figure 7.** Average counts of true positive (top rows of a and b, in blue) and false positive  
 466 (bottom rows of a and b, in red) detections for two methods, RDA and LFMM, using their best  
 467 cutoffs and a sample size of 20 individuals per deme. The first column shows the average  
 468 number of loci detected by both methods. The second and third columns show the average  
 469 number of detections that are unique to RDA and LFMM, respectively. (a) Results for GEAs  
 470 using Habitat as the only predictor. (b) Results for GEAs using Habitat and the (uninformative)  
 471 X-coordinate predictor. Results are presented for different sampling strategies (R = random, P =  
 472 pairs, T = transects), demographies (1R and 2R = refugial expansion, IBD = equilibrium  
 473 isolation by distance, IM = equilibrium island model), and sample sizes (rows).

474 **Table 1.** Average change in power (from empirical  $p$ -values) and true and false positive rates  
 475 (from cutoffs) for RDA using three different approaches for partialling out population structure.  
 476 All approaches led to an overall loss of power and an increase in false positive rates. There are  
 477 no MEM corrections for the IM demography, which has no significant spatial structure. Ancestry  
 478 corrections apply only to 20 individual runs, where  $K \neq 1$ .  
 479

| Indiv./<br>deme                | Demo-<br>graphy | Ancestry                                                 | MEMs uncorr.<br>Habitat | All retained<br>MEMs |
|--------------------------------|-----------------|----------------------------------------------------------|-------------------------|----------------------|
|                                |                 | <b>Change in power (empirical <math>p</math>-values)</b> |                         |                      |
| 6                              | 1R              | -0.53                                                    | -0.59                   | -0.72                |
|                                | 2R              | -0.81                                                    | -0.53                   | -0.84                |
|                                | IBD             | -0.94                                                    | -0.75                   | -0.96                |
|                                | IM              | -                                                        | -                       | -                    |
| 20                             | 1R              | -0.26                                                    | -0.14                   | -0.58                |
|                                | 2R              | -0.64                                                    | -0.12                   | -0.70                |
|                                | IBD             | -0.93                                                    | -0.69                   | -0.93                |
|                                | IM              | -0.70                                                    | -                       | -                    |
| Average                        |                 | -0.69                                                    | -0.47                   | -0.79                |
| <b>Change in TPR (cutoffs)</b> |                 |                                                          |                         |                      |
| 6                              | 1R              | -0.39                                                    | -0.43                   | -0.69                |
|                                | 2R              | -0.70                                                    | -0.40                   | -0.76                |
|                                | IBD             | -0.93                                                    | -0.69                   | -0.94                |
|                                | IM              | -                                                        | -                       | -                    |
| 20                             | 1R              | -0.16                                                    | -0.16                   | -0.47                |
|                                | 2R              | -0.47                                                    | -0.17                   | -0.51                |
|                                | IBD             | -0.92                                                    | -0.60                   | -0.90                |
|                                | IM              | -0.71                                                    | -                       | -                    |
| Average                        |                 | -0.61                                                    | -0.41                   | -0.71                |
| <b>Change in FPR (cutoffs)</b> |                 |                                                          |                         |                      |
| 6                              | 1R              | 0.0011                                                   | 0.0013                  | 0.0020               |
|                                | 2R              | 0.0021                                                   | 0.0011                  | 0.0021               |
|                                | IBD             | 0.0025                                                   | 0.0017                  | 0.0023               |
|                                | IM              | -                                                        | -                       | -                    |
| 20                             | 1R              | 0.0005                                                   | 0.0003                  | 0.0014               |
|                                | 2R              | 0.0014                                                   | 0.0003                  | 0.0015               |
|                                | IBD             | 0.0021                                                   | 0.0010                  | 0.0021               |
|                                | IM              | 0.0023                                                   | -                       | -                    |
| Average                        |                 | 0.0017                                                   | 0.0009                  | 0.0019               |



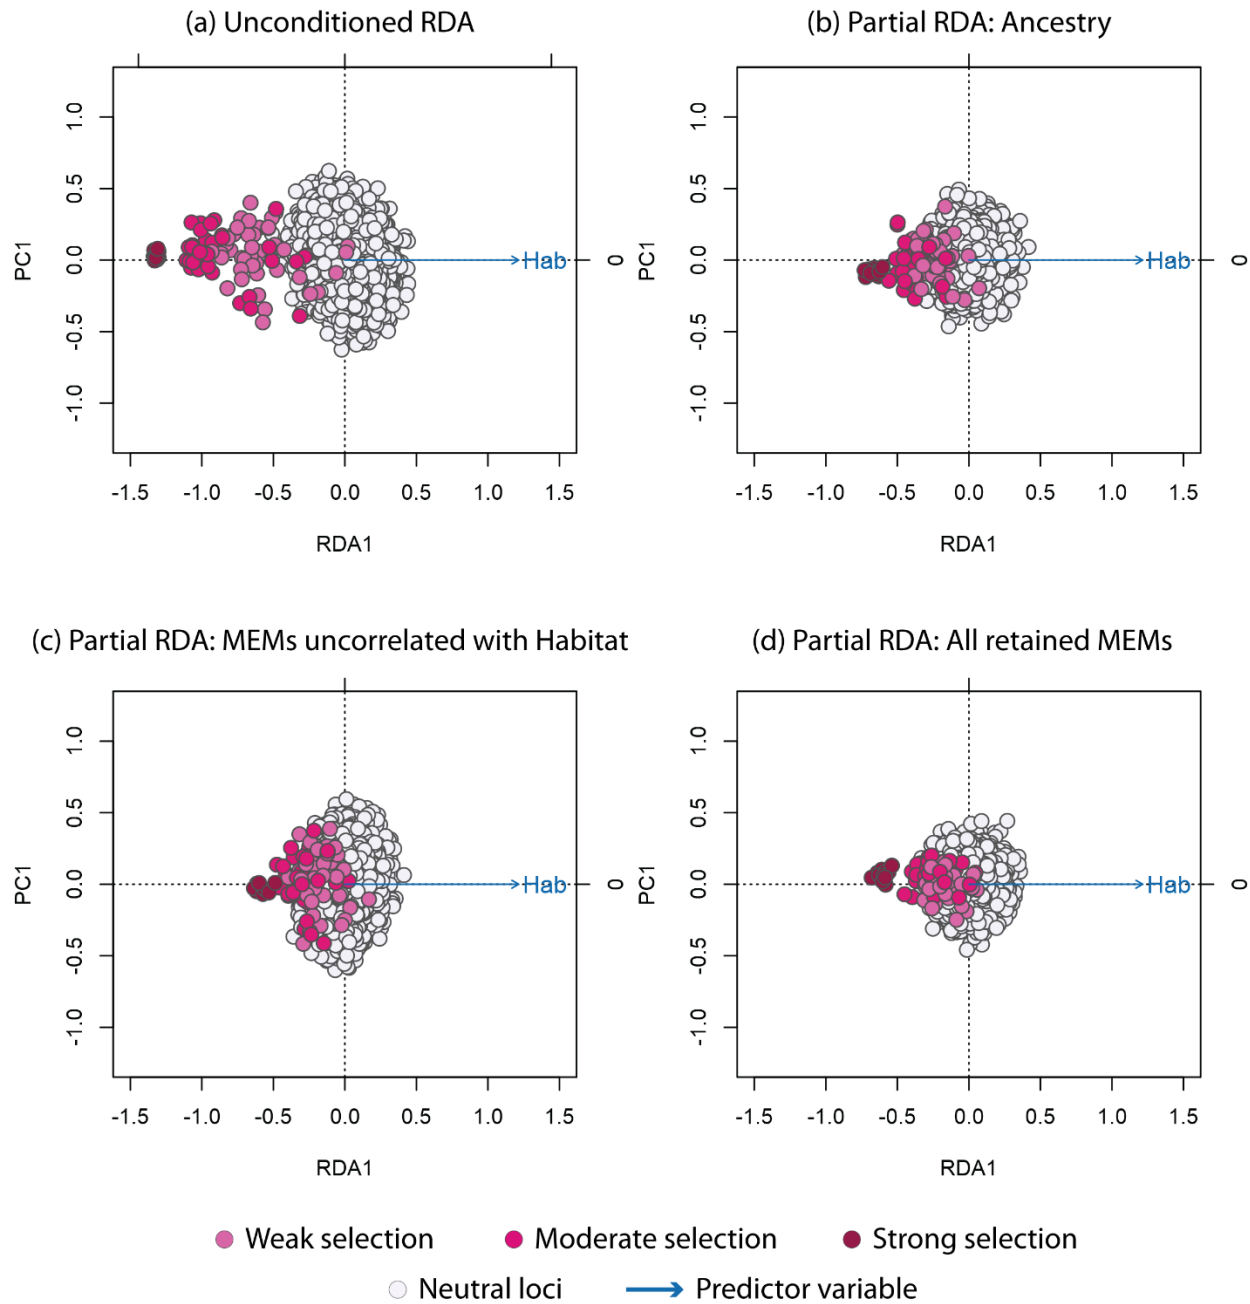

480

481 **Figure 8.** Redundancy analysis biplots for simulation 1R, paired sampling, environmental  
482 surface 453, and 6 individuals per deme. Distribution of loci using: (a) unconditioned RDA (no  
483 correction for population structure); (b) partial RDA using ancestry values; (c) partial RDA using  
484 retained MEMs that are not significantly correlated with Habitat; (d) partial RDA using all  
485 retained MEMs.

486 Empirical data set:

487 There were four significant RDA axes in the ordination of the wolf data set (Fig. 9), which  
488 returned 556 unique candidate loci that loaded +/- 3 SD from the mean loading on each axis: 171  
489 SNPs detected on RDA axis 1, 222 on RDA axis 2, and 163 on RDA axis 3 (Fig. 10). Detections  
490 on axis 4 were all redundant with loci already identified on axes 1-3. The majority of detected  
491 SNPs were most strongly correlated with precipitation covariates: 231 SNPs correlated with  
492 annual precipitation (AP) and 144 SNPs correlated with precipitation seasonality (cvP). The  
493 number of SNPs correlated with the remaining predictors were: 72 with mean diurnal  
494 temperature range (MDR); 79 with annual mean temperature (AMT); 13 with NDVI; 12 with  
495 elevation; 4 with temperature seasonality (sdT); and 1 with percent tree cover (Tree).

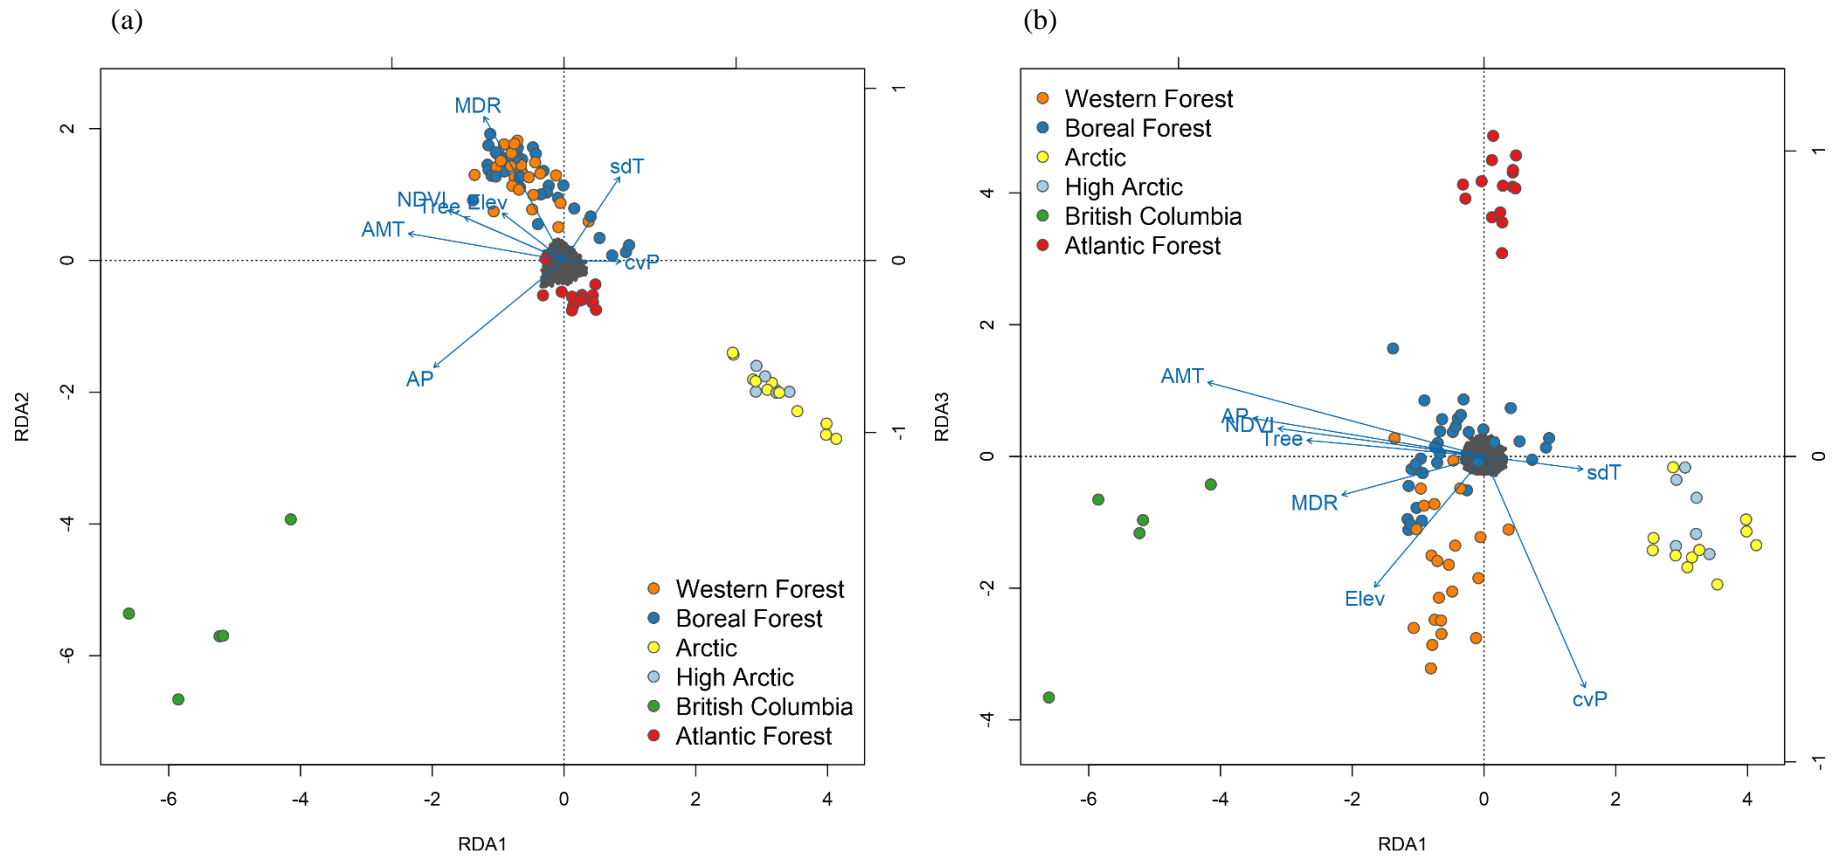

496 **Figure 9.** Triplots of wolf data for (a) RDA axes 1 and 2, and (b) axes 1 and 3. The dark gray cloud of points at the center of  
 497 each plot represent the SNPs, colored points represent individual wolves with coding by ecotype. Blue vectors represent  
 498 environmental predictors (see text for abbreviations). Triplot scaling is symmetrical (both SNP and individual scores are scaled  
 499 symmetrically by the square root of the eigenvalues).

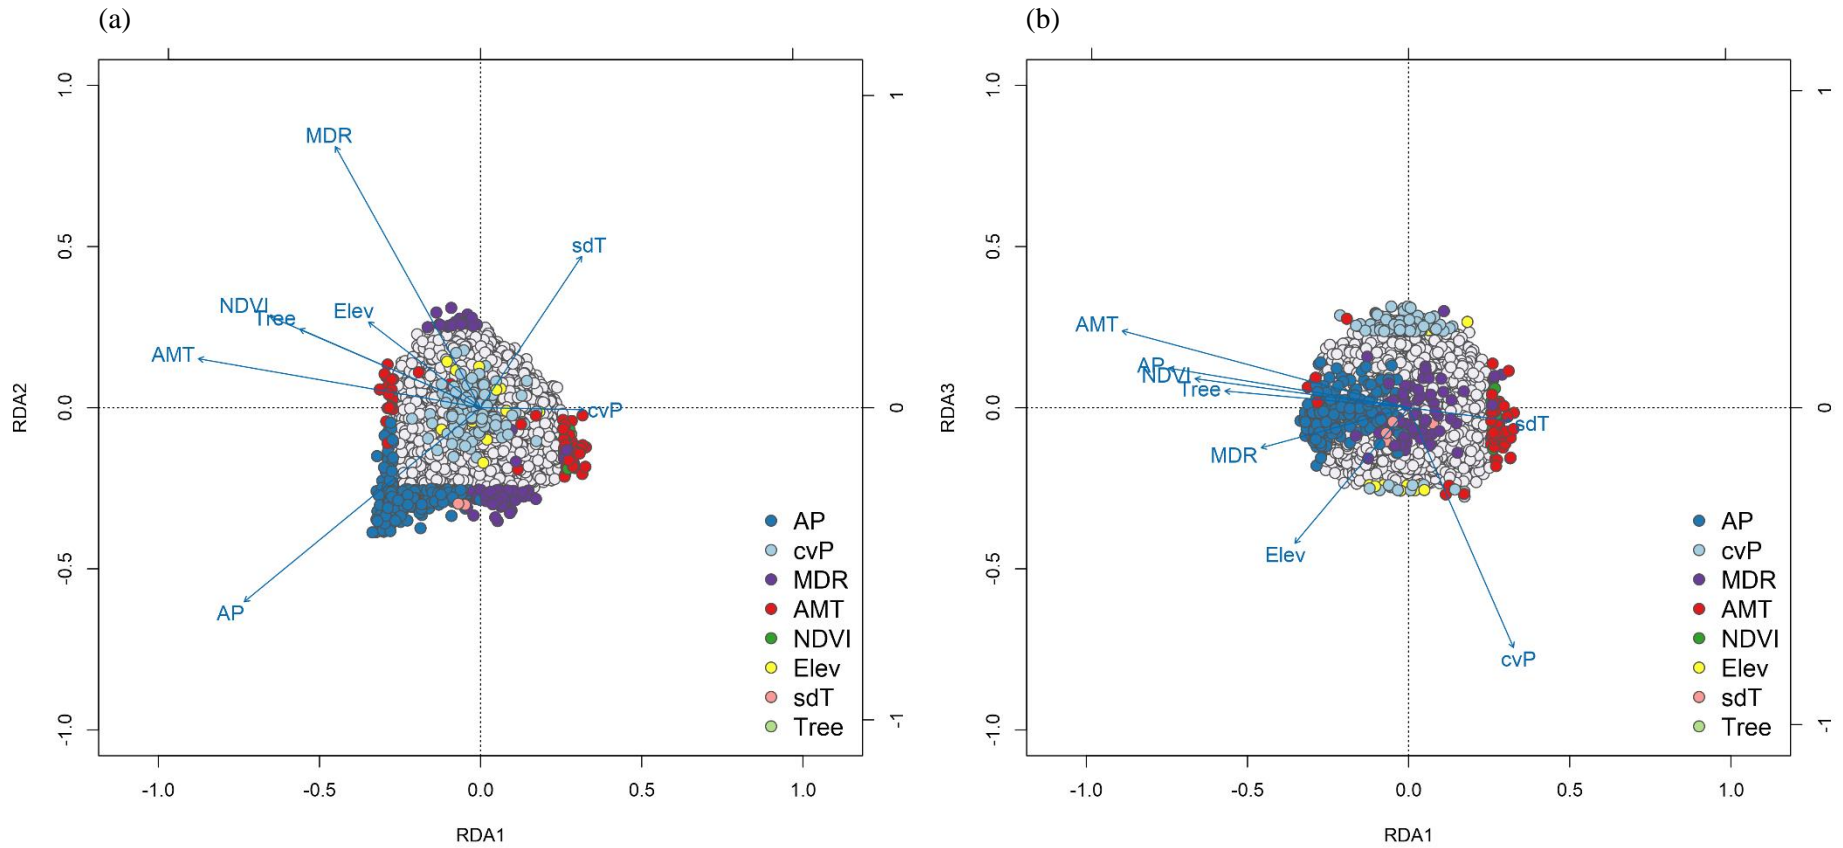

500 **Figure 10.** Magnification of wolf data triplots from Figure 9 to highlight SNP loadings on (a) RDA axes 1 and 2, and (b) axes 1  
 501 and 3. Candidate SNPs are shown as colored points with coding by most highly correlated environmental predictor. SNPs not  
 502 identified as candidates (neutral SNPs) are shown in light gray. Blue vectors represent environmental predictors (see text for  
 503 abbreviations).

504 **Discussion**

505 Multivariate genotype-environment association (GEA) methods have been noted for their ability  
506 to detect multilocus selection (Rellstab *et al.*, 2015; Hoban *et al.*, 2016), although there has been  
507 no controlled assessment of the effectiveness of these methods in detecting multilocus selection  
508 to date. Since these approaches are increasingly being used in empirical analyses (e.g. Bourret *et*  
509 *al.* 2014; Briec *et al.* 2015; Pavey *et al.* 2015; Hecht *et al.* 2015; Laporte *et al.* 2016; Brauer *et*  
510 *al.* 2016), it is important that these claims are evaluated to ensure that the most effective GEA  
511 methods are being used, and that their results are being appropriately interpreted.

512 Here we compare a suite of methods for detecting selection in a simulation framework to  
513 assess their ability to correctly detect multilocus selection under different demographic and  
514 sampling scenarios. We found that constrained ordinations had the best overall performance  
515 across the demographics, sampling designs, sample sizes, and selection levels tested here. The  
516 univariate LFMM method also performed well, though power was scenario-dependent and was  
517 reduced for loci under weak selection (in agreement with findings by de Villemereuil *et al.*,  
518 2014). Random Forest, by contrast, had lower detection rates overall. In the following sections  
519 we discuss the performance of these methods and provide suggestions for their use on empirical  
520 data sets.

521

522 Random Forest:

523 Random Forest performed relatively poorly as a GEA. This poor performance is caused by the  
524 sparsity of the genotype matrix (i.e., most SNPs are not under selection), which results in  
525 detection that is dominated by strongly selected loci (i.e., loci with strong marginal effects). This  
526 issue has been documented in other simulation and empirical studies (Goldstein *et al.*, 2010;  
527 Winham *et al.*, 2012; Wright *et al.*, 2016) and indicates that RF is not suited to identifying weak  
528 multilocus selection or interaction effects in these large data sets. Empirical studies that have  
529 used RF as a GEA have likely identified a subset of loci under strong selection, but are unlikely  
530 to have identified loci underlying more complex genetic architectures. Note that the amount of  
531 environmental variance explained by the RF model can be high (i.e., overall percent variance  
532 explained by the detected SNPs, which ranged from 79-91% for these simulations, Table S5),  
533 while still failing to identify most of the loci under selection. Removing strong associations from

534 the genotypic matrix can potentially help with the detection of weaker effects (Goldstein *et al.*,  
535 2010), but this approach has not been tested on large matrices. Combined with the computational  
536 burden of this method (taking ~10 days on a single core for the larger data sets), as well as the  
537 availability of fast and accurate alternatives such as RDA (which takes ~3 minutes on the same  
538 data), it is clear that RF is not a viable option for GEA analysis of genomic data.

539 Random Forest does hold promise for the detection of interaction effects in much smaller  
540 data sets (e.g., tens of loci, Holliday *et al.* 2012). However, this is an area of active research, and  
541 the capacity of RF models in their current form to both capture and identify SNP interactions has  
542 been disputed (Winham *et al.*, 2012; Wright *et al.*, 2016). New modifications of RF models are  
543 being developed to more effectively identify interaction effects (e.g. Li *et al.* 2016), but these  
544 models are computationally demanding and are not designed for large data sets. Overall,  
545 extensions of RF show potential for identifying more complex genetic architectures on small sets  
546 of loci, but caution is warranted in using them on empirical data prior to rigorous testing on  
547 realistic simulation scenarios.

548

#### 549 Constrained ordinations:

550 The three constrained ordination methods all performed well. RDA in particular had the highest  
551 overall power across all methods tested here (Figs. 1-3). Ordinations were relatively insensitive  
552 to sample size (6 vs 20 individuals sampled per deme), with the exception of the IM  
553 demography, where larger sample sizes consistently improved TPRs, as previously noted by De  
554 Mita *et al.* (2013) and Lotterhos & Whitlock (2015) for univariate GEAs. Power was lowest in  
555 the IM demography, which is typified by a lack of spatial autocorrelation in allele frequencies  
556 and a reduced signal of local adaptation (Table S6), making detection more difficult. This  
557 corresponds with univariate GEA results from Lotterhos & Whitlock (2015), who found very  
558 low detection rates for loci under weak selection in the IM demography. Power was highest for  
559 IBD, followed by the 2R and 1R demographies. Data from natural systems likely lie somewhere  
560 among these demographic extremes, and successful differentiation in the presence of IBD and  
561 non-equilibrium conditions indicate that ordinations should work well across a range of natural  
562 systems.

563 All three methods were relatively insensitive to sampling design, with transects  
564 performing slightly better in 1R and random sampling performing worst in IM (Figs. 4, 6, and  
565 S2). Otherwise results were consistent across designs, in contrast to the univariate GEAs tested  
566 by Lotterhos and Whitlock (2015), most of which had higher power with the paired sampling  
567 strategy. Ordinations are likely less sensitive to sampling design since they take advantage of  
568 covarying signals of selection across loci, making them more robust to sampling that does not  
569 maximize environmental differentiation (e.g., random or transect designs). All methods  
570 performed similarly in terms of detection rates across selection strengths (Figs. 4 and S2). As  
571 expected, weak selection was more difficult to detect than moderate or strong selection, except  
572 for IBD, where detection levels were high regardless of selection.

573 High TPRs were maintained when using cutoffs for all three ordination methods (Fig. 6).  
574 False positives were universally low for RDA and dbRDA. By contrast, cRDA showed high  
575 FPRs for all demographies except IM, tempering its slightly higher TPRs. These higher FPRs are  
576 a consequence of using component axes as predictors. Across all scenarios and sample sizes,  
577 cRDA detected component 1, 2, or both as significantly associated with the constrained RDA  
578 axes (Table S7). Most selected loci load on these components (keeping TPRs high), but neutral  
579 markers also load on these axes, especially in cases where there are strong trends in neutral loci  
580 (i.e., maximum trends in neutral markers reflect FPRs for cRDA, Table S6, Fig. 6). Given these  
581 results, we hypothesized that it might be challenging for cRDA to detect weak selection in the  
582 absence of a covarying signal from loci with stronger selection coefficients. If the selection  
583 signature is weak, it may load on a lower-level component axis (i.e., an axis that explains less of  
584 the genetic variance), or it may load on higher-level axes, but fail to be significantly associated  
585 with the constrained axes. Note that although cRDA contains a step to reduce the number of  
586 components, parallel analysis resulted in retention of all axes in every simulation tested here  
587 (Table S7). This meant that cRDA could search for the signal of selection across all possible  
588 components.

589 When tested on simulations with loci under weak selection only, RDA, which uses the  
590 genotype matrix directly, maintained similar power as in the full data set (except in the IM  
591 scenario, where power was higher when all selected loci were included), indicating that selection  
592 signals can be detected with this method in the absence of loci under strong selection (Fig. 5, top

593 row). By contrast, cRDA detection was more variable, ranging from comparable detection rates  
594 with the full data set, to no/poor detections under certain demographics and sample sizes. In  
595 these latter cases, poor performance is reflected in the component axes detected as significant  
596 (Table S7); instead of identifying the signal in the first few axes, a variable set of lower-variance  
597 axes are detected (or none are detected at all). This indicates that the method is not able to “find”  
598 the selected signal in the component axes in cases where that signal is not driven by strong  
599 selection. This result, in addition to higher FPRs for cRDA, builds a case for using the genotype  
600 matrix directly with a constrained ordination such as RDA or dbRDA, as opposed to a  
601 preliminary step of data conversion with PCA.

602

### 603 Should results from different tests be combined?

604 A common approach in local adaptation studies is to run multiple tests (GEA only, or a  
605 combination of GEA and differentiation methods) and look for overlapping detections across  
606 methods. This ad hoc approach is thought to increase confidence in TPRs, while minimizing  
607 FPRs. The problem with this approach is that it can bias detection toward strong selective sweeps  
608 to the exclusion of other adaptive mechanisms which may be equally important in shaping  
609 phenotypic variation (Le Corre & Kremer, 2012; François *et al.*, 2016). If the goal is to detect  
610 other forms of selection such as recent selection or selection on standing genetic variation, this  
611 approach will not be effective since most methods are unlikely to detect these weak signals.  
612 Additionally, this approach limits detections to those of the least powerful method used, forcing  
613 overall detection rates to be a function of the weakest method implemented.

614 The complexities of this issue are illustrated by comparing results across two sets of RDA  
615 and LFMM results: one where the driving environmental variable is known (Fig. 7a), and  
616 another where the environmental predictors represent hypotheses about the most important  
617 factors driving selection (Fig. 7b). In both cases, agreement on TPs is high, and RDA has a large  
618 number of true positive detections that are unique to that method, while unique detections by  
619 LFMM are largely limited to the IM demography. The differences in the cases lies in FP  
620 detections: when selection is well understood, and uninformative predictors are not used,  
621 retaining RDA detections only is the approach that will maximize TPRs (and detection of weak  
622 loci under selection) while maintaining minimal to zero FPRs (Fig. 7a). Where GEA analyses are



623 more exploratory (i.e., when selective gradients are unknown), combining detections can help  
624 reduce FPRs (Fig. 7b). If some FP detections are acceptable, keeping only RDA detections will  
625 improve TPRs at the cost of slightly increased FPRs. A third approach, keeping all detections  
626 across both methods, would yield little improvement in TPRs in both cases, since LFMM has  
627 high levels of unique FPs, and minimal unique TP detections.

628         The decision of whether and how to combine results from different tests will be specific  
629 to the study questions, the tolerance for false negative and false positive detections, and the  
630 capacity for follow-up analyses on detected markers. For example, if the goal is to detect loci  
631 with strong effects while keeping false positive rates as low as possible, or GEA is being used as  
632 an exploratory analysis, running multiple GEA methods and considering only overlapping  
633 detections could be a suitable strategy. However, if the goal is to detect selection on standing  
634 genetic variation or a recent selection event, and the most important selective agents (or close  
635 correlates of them) are known, combining detections from multiple tests would likely be too  
636 conservative. In this case, the best approach would be to use a single GEA method, such as  
637 RDA, that can effectively detect covarying signals arising from multilocus selection, while being  
638 robust to selection strength, sampling design, and sample size.

639

#### 640 Correction for population structure:

641 All three methods used to correct for populations structure in RDA resulted in substantial loss of  
642 power and, in most cases, increased FPRs (Table 1 and S4). The effect of correcting for  
643 population structure can be seen in ordination biplots from an example simulation scenario (Fig.  
644 8). In this 1R demographic scenario, the selection surface (“Hab”) and the refugial expansion  
645 gradient coincide, so any correction for population structure will also remove the signal of  
646 selection from the selected loci. The correction is most conservative when using all significant  
647 MEM predictors to account for spatial structure (Fig. 8d), and is less conservative when using  
648 only MEMs not significantly correlated with environment (Fig. 8c), or ancestry coefficients (Fig.  
649 8b). In all cases, however, the loss of the selection signal is significant (Table 1), and is visible in  
650 the increasing overlap of selected loci with neutral loci.

651         While the simulations used here have overall low global  $F_{st}$  (average  $F_{st} = 0.05$ ),  
652 population structure is significant enough in many scenarios to result in elevated FPRs for GLMs

653 (univariate linear models which do not correct for population structure, Fig. 6). Despite this,  
654 RDA and dbRDA (the multivariate analogue of GLMs) do not show elevated FPRs, even when  
655 selection covaries with a range expansion front, as in the 1R and 2R demographies. This is likely  
656 because only loci with extreme loadings are identified as potentially under selection, leaving  
657 most neutral loci, which share a similar, but weaker, spatial signature, loading less than  $\pm 3$  SD  
658 from the mean. The generality of these results needs to be tested in a comprehensive manner  
659 using an expanded simulation parameter space that includes stronger population structure and  
660 metapopulation dynamics; this work is currently in progress. In the meantime, we recommend  
661 that RDA be used conservatively in empirical systems with higher population structure than is  
662 tested here, for example, by finding overlap between detections identified by RDA and LFMM  
663 (or another GEA that accounts for population structure).

664

#### 665 Empirical example:

666 Triplots of three of the four significant RDA axes for the wolf data show SNPs (dark gray  
667 points), individuals (colored circles), and environmental variables (blue arrows, Fig. 9). The  
668 relative arrangement of these items in the ordination space reflects their relationship with the  
669 ordination axes, which are linear combinations of the predictor variables. For example,  
670 individuals from wet and temperate British Columbia are positively related to high annual  
671 precipitation (AP) and low temperature seasonality (sdT, Fig. 9a). By contrast, Arctic and High  
672 Arctic individuals are characterized by small mean diurnal temperature range (MDR), low  
673 annual mean temperature (AMT), lower levels of tree cover (Tree) and NDVI (a measure of  
674 vegetation greenness), and are found at lower elevation (Fig. 9a). Atlantic Forest and Western  
675 Forest individuals load more strongly on RDA axis 3, showing weak and strong precipitation  
676 seasonality (cvP) respectively (Fig. 9b), consistent with continental-scale climate in these  
677 regions.

678 If we zoom into the SNPs, we can visualize how candidate SNPs load on the RDA axes  
679 (Fig. 10). For example, SNPs most strongly correlated with AP have strong loadings in the lower  
680 left quadrant between RDA axes 1 and 2 along the AP vector, accounting for the majority of  
681 these 231 AP-correlated detections (Fig. 10a). Most candidates highly correlated with AMT and  
682 MDR load strongly on axes 1 and 2, respectively. Note how candidate SNPs correlated with

683 precipitation seasonality (cvP) and elevation are located in the center of the plot, and will not be  
684 detected as outliers on axes 1 or 2 (Fig. 10a). However, these loci are detected as outliers on axis  
685 3 (Fig. 10b). Overall, candidate SNPs on axis 1 represent multilocus haplotypes associated with  
686 annual precipitation and mean diurnal range; SNPs on axis 2 represent haplotypes associated  
687 with annual precipitation and annual mean temperature; and SNPs on axis 3 represent haplotypes  
688 associated with precipitation seasonality.

689         Of the 1661 candidate SNPs identified by Schweizer *et al.*, (2016) using Bayenv (Bayes  
690 Factor > 3), only 52 were found in common with the 556 candidates from RDA. Of these 52  
691 common detections, only nine were identified based on the same environmental predictor. If we  
692 include Bayenv detections using highly correlated predictors (removed for RDA) we find nine  
693 more candidates identified in common. Additionally, only 18% of the Bayenv identifications  
694 were most strongly related to precipitation variables, which are known drivers of morphology  
695 and population structure in gray wolves (Geffen *et al.*, 2004; O’Keefe *et al.*, 2013; Schweizer *et*  
696 *al.*, 2016). By contrast, 67% of RDA detections were most strongly associated with precipitation  
697 variables, providing new candidate regions for understanding local adaptation of gray wolves  
698 across their North American range.

699

#### 700 Conclusions and recommendations:

701 We found that constrained ordinations, especially RDA, show a superior combination of low  
702 FPRs and high TPRs across weak, moderate, and strong multilocus selection. These results were  
703 robust across the levels of population structure, demographic histories, sampling designs, and  
704 sample sizes tested here. Additionally, RDA outperformed an alternative ordination-based  
705 approach, cRDA, especially (and importantly) when the multilocus selection signature was  
706 completely derived from loci under weak selection. It is important to note that population  
707 structure was relatively low in these simulations. Results may differ for systems with strong  
708 population structure or metapopulation dynamics, where it can be important to correct for  
709 structure or combine detections with another GEA that accounts for structure. Continued testing  
710 of these promising methods is needed in simulation frameworks that include more population  
711 structure, multiple selection surfaces, and genetic architectures that are more complex than the  
712 multilocus selection response modeled here. However, this study indicates that constrained

713 ordinations are an effective means of detecting adaptive processes that result in weak, multilocus  
714 molecular signatures, providing a powerful tool for investigating the genetic basis of local  
715 adaptation and informing management actions to conserve the evolutionary potential of species  
716 of agricultural, forestry, fisheries, and conservation concern.

717 **Acknowledgements**

718 We thank Katie Lotterhos for sharing her simulation data (Lotterhos & Whitlock 2015) and for  
719 additional spatial coordinate data and code. Tom Milledge with Duke Resource Computing  
720 provided invaluable assistance with the Duke Compute Cluster. We also thank Olivier François  
721 for helpful advice with LFMM, and three reviewers for constructive feedback that greatly  
722 improved the manuscript. BRF was supported by a Katherine Goodman Stern Fellowship from  
723 the Duke University Graduate School and a PEO Scholar Award.

724 **References**

- 725 Angers B, Magnan P, Plante M, Bernatchez L (1999) Canonical correspondence analysis for estimating  
726 spatial and environmental effects on microsatellite gene diversity in brook charr (*Salvelinus*  
727 *fontinalis*). *Molecular Ecology*, **8**, 1043–1053.
- 728 Benjamini Y, Hochberg Y (1995) Controlling the false discovery rate - a practical and powerful approach.  
729 *Journal of the Royal Statistical Society Series B-Methodological*, **57**, 289–300.
- 730 Bivand R, Hauke J, Kossowski T (2013) Computing the Jacobian in Gaussian spatial autoregressive  
731 models: an illustrated comparison of available methods. *Geographical Analysis*, **45**, 150–179.
- 732 Blanchet FG, Legendre P, Borcard D (2008) Forward selection of explanatory variables. *Ecology*, **89**,  
733 2623–2632.
- 734 Bourret V, Dionne M, Bernatchez L (2014) Detecting genotypic changes associated with selective  
735 mortality at sea in Atlantic salmon: polygenic multilocus analysis surpasses genome scan.  
736 *Molecular Ecology*, **23**, 4444–4457.
- 737 Brauer CJ, Hammer MP, Beheregaray LB (2016) Riverscape genomics of a threatened fish across a  
738 hydroclimatically heterogeneous river basin. *Molecular Ecology*, **25**, 5093–5113.
- 739 Bray JR, Curtis JT (1957) An ordination of the upland forest communities of southern Wisconsin.  
740 *Ecological Monographs*, **27**, 325–349.
- 741 Breiman L (2001) Random Forests. *Machine Learning*, **45**, 5–32.
- 742 Briec MSO, Ono K, Drinan DP, Naish KA (2015) Integration of Random Forest with population-based  
743 outlier analyses provides insight on the genomic basis and evolution of run timing in Chinook  
744 salmon (*Oncorhynchus tshawytscha*). *Molecular Ecology*, **24**, 2729–2746.
- 745 Cavalli-Sforza LL (1966) Population structure and human evolution. *Proceedings of the Royal Society B:*  
746 *Biological Sciences*, **164**, 362–379.
- 747 Coop G, Witonsky D, Rienzo AD, Pritchard JK (2010) Using environmental correlations to identify loci  
748 underlying local adaptation. *Genetics*, **185**, 1411–1423.
- 749 De Mita S, Thuillet A-C, Gay L, Ahmadi N, Manel S, Ronfort J, Vigouroux Y (2013) Detecting selection  
750 along environmental gradients: analysis of eight methods and their effectiveness for outbreeding  
751 and selfing populations. *Molecular Ecology*, **22**, 1383–1399.
- 752 De'ath G, Fabricius KE (2000) Classification and regression trees: a powerful yet simple technique for  
753 ecological data analysis. *Ecology*, **81**, 3178–3192.
- 754 Dray S, Legendre P, Peres-Neto PR (2006) Spatial modelling: a comprehensive framework for principal  
755 coordinate analysis of neighbour matrices (PCNM). *Ecological Modelling*, **196**, 483–493.
- 756 Dray S, Péliissier R, Couteron P et al. (2012) Community ecology in the age of multivariate multiscale  
757 spatial analysis. *Ecological Monographs*, **82**, 257–275.
- 758 Dray S, Blanchet G, Borcard D et al. (2016) *adespatial: Multivariate multiscale spatial analysis*. R  
759 package version 0.0-7.

- 760 Duforet-Frebourg N, Bazin E, Blum MGB (2014) Genome scans for detecting footprints of local  
761 adaptation using a Bayesian factor model. *Molecular Biology and Evolution*, **31**, 2483–2495.
- 762 Forester BR, Jones MR, Joost S, Landguth EL, Lasky JR (2016) Detecting spatial genetic signatures of  
763 local adaptation in heterogeneous landscapes. *Molecular Ecology*, **25**, 104–120.
- 764 François O, Martins H, Caye K, Schoville SD (2016) Controlling false discoveries in genome scans for  
765 selection. *Molecular Ecology*, **25**, 454–469.
- 766 Frichot E, François O (2015) LEA: An R package for landscape and ecological association studies.  
767 *Methods in Ecology and Evolution*, **6**, 925–929.
- 768 Frichot E, Schoville SD, Bouchard G, François O (2013) Testing for associations between loci and  
769 environmental gradients using latent factor mixed models. *Molecular Biology and Evolution*, **30**,  
770 1687–1699.
- 771 Frichot E, Mathieu F, Trouillon T, Bouchard G, François O (2014) Fast and efficient estimation of  
772 individual ancestry coefficients. *Genetics*, **196**, 973–983.
- 773 Geffen E, Anderson MJ, Wayne RK (2004) Climate and habitat barriers to dispersal in the highly mobile  
774 grey wolf. *Molecular Ecology*, **13**, 2481–2490.
- 775 Goldstein BA, Hubbard AE, Cutler A, Barcellos LF (2010) An application of Random Forests to a  
776 genome-wide association dataset: methodological considerations & new findings. *BMC Genetics*,  
777 **11**, 1–13.
- 778 Grivet D, Sork VL, Westfall RD, Davis FW (2008) Conserving the evolutionary potential of California  
779 valley oak (*Quercus lobata* Née): a multivariate genetic approach to conservation planning.  
780 *Molecular Ecology*, **17**, 139–156.
- 781 Günther T, Coop G (2013) Robust identification of local adaptation from allele frequencies. *Genetics*,  
782 **195**, 205–220.
- 783 Hancock AM, Brachi B, Faure N et al. (2011) Adaptation to climate across the *Arabidopsis thaliana*  
784 genome. *Science*, **334**, 83–86.
- 785 Harrisson KA, Pavlova A, Telonis-Scott M, Sunnucks P (2014) Using genomics to characterize  
786 evolutionary potential for conservation of wild populations. *Evolutionary Applications*, **7**, 1008–  
787 1025.
- 788 Hecht BC, Matala AP, Hess JE, Narum SR (2015) Environmental adaptation in Chinook salmon  
789 (*Oncorhynchus tshawytscha*) throughout their North American range. *Molecular Ecology*, **24**,  
790 5573–5595.
- 791 Hoban S, Kelley JL, Lotterhos KE et al. (2016) Finding the genomic basis of local adaptation: pitfalls,  
792 practical solutions, and future directions. *The American Naturalist*, **188**, 379–397.
- 793 Holliday JA, Wang T, Aitken S (2012) Predicting adaptive phenotypes from multilocus genotypes in  
794 Sitka Spruce (*Picea sitchensis*) using Random Forest. *G3: Genes/Genomes/Genetics*, **2**, 1085–  
795 1093.
- 796 Horn JL (1965) A rationale and test for the number of factors in factor analysis. *Psychometrika*, **30**, 179–  
797 185.

- 798 Huang F (2015) *hornpa: Horn's (1965) Test to Determine the Number of Components/Factors*. R  
799 package version 1.0.
- 800 Jombart T, Pontier D, Dufour A-B (2009) Genetic markers in the playground of multivariate analysis.  
801 *Heredity*, **102**, 330–341.
- 802 Joost S, Bonin A, Bruford MW, Després L, Conord C, Erhardt G, Taberlet P (2007) A spatial analysis  
803 method (SAM) to detect candidate loci for selection: towards a landscape genomics approach to  
804 adaptation. *Molecular Ecology*, **16**, 3955–3969.
- 805 Laporte M, Pavey SA, Rougeux C et al. (2016) RAD sequencing reveals within-generation polygenic  
806 selection in response to anthropogenic organic and metal contamination in North Atlantic Eels.  
807 *Molecular Ecology*, **25**, 219–237.
- 808 Lasky JR, Des Marais DL, McKay JK, Richards JH, Juenger TE, Keitt TH (2012) Characterizing  
809 genomic variation of *Arabidopsis thaliana*: the roles of geography and climate. *Molecular*  
810 *Ecology*, **21**, 5512–5529.
- 811 Lasky JR, Marais D, L D et al. (2014) Natural variation in abiotic stress responsive gene expression and  
812 local adaptation to climate in *Arabidopsis thaliana*. *Molecular Biology and Evolution*, **31**, 2283–  
813 2296.
- 814 Lasky JR, Upadhyaya HD, Ramu P et al. (2015) Genome-environment associations in sorghum landraces  
815 predict adaptive traits. *Science Advances*, **1**, e1400218.
- 816 Le Corre V, Kremer A (2012) The genetic differentiation at quantitative trait loci under local adaptation.  
817 *Molecular Ecology*, **21**, 1548–1566.
- 818 Legendre P, Legendre L (2012) *Numerical Ecology*, 3rd edition edn. Elsevier, Amsterdam, The  
819 Netherlands.
- 820 Li J, Malley JD, Andrew AS, Karagas MR, Moore JH (2016) Detecting gene-gene interactions using a  
821 permutation-based random forest method. *BioData Mining*, **9**, 14.
- 822 Lotterhos KE, Whitlock MC (2014) Evaluation of demographic history and neutral parameterization on  
823 the performance of FST outlier tests. *Molecular Ecology*, **23**, 2178–2192.
- 824 Lotterhos KE, Whitlock MC (2015) The relative power of genome scans to detect local adaptation  
825 depends on sampling design and statistical method. *Molecular Ecology*, **24**, 1031–1046.
- 826 Mitton JB, Linhart YB, Hamrick JL, Beckman JS (1977) Observations on the genetic structure and  
827 mating system of Ponderosa Pine in the Colorado front range. *Theoretical and Applied Genetics*,  
828 **51**, 5–13.
- 829 Mulley JC, James JW, Barker JSF (1979) Allozyme genotype-environment relationships in natural  
830 populations of *Drosophila buzzatii*. *Biochemical Genetics*, **17**, 105–126.
- 831 O'Keefe FR, Meachen J, Fet EV, Brannick A (2013) Ecological determinants of clinal morphological  
832 variation in the cranium of the North American gray wolf. *Journal of Mammalogy*, **94**, 1223–  
833 1236.
- 834 Oksanen J, Blanchet FG, Kindt R et al. (2013) *vegan: Community Ecology Package*.



- 835 Pavey SA, Gaudin J, Normandeau E, Dionne M, Castonguay M, Audet C, Bernatchez L (2015) RAD  
836 sequencing highlights polygenic discrimination of habitat ecotypes in the panmictic American  
837 Eel. *Current Biology*, **25**, 1666–1671.
- 838 R Development Core Team (2015) *R: a language and environment for statistical computing*. R  
839 Foundation for Statistical Computing, Vienna, Austria.
- 840 Rellstab C, Gugerli F, Eckert AJ, Hancock AM, Holderegger R (2015) A practical guide to environmental  
841 association analysis in landscape genomics. *Molecular Ecology*, **24**, 4348–4370.
- 842 Savolainen O, Lascoux M, Merilä J (2013) Ecological genomics of local adaptation. *Nature Reviews*  
843 *Genetics*, **14**, 807–820.
- 844 Schweizer RM, vonHoldt BM, Harrigan R et al. (2016) Genetic subdivision and candidate genes under  
845 selection in North American grey wolves. *Molecular Ecology*, **25**, 380–402.
- 846 Storey JD, Bass AJ, Dabney A, Robinson D (2015) *qvalue: Q-value estimation for false discovery rate*  
847 *control*. R package version 2.2.2.
- 848 Stucki S, Orozco-terWengel P, Forester BR et al. (2016) High performance computation of landscape  
849 genomic models including local indicators of spatial association. *Molecular Ecology Resources*.
- 850 Tiffin P, Ross-Ibarra J (2014) Advances and limits of using population genetics to understand local  
851 adaptation. *Trends in Ecology & Evolution*, **29**, 673–680.
- 852 de Villemereuil P, Frichot É, Bazin É, François O, Gaggiotti OE (2014) Genome scan methods against  
853 more complex models: when and how much should we trust them? *Molecular Ecology*, **23**, 2006–  
854 2019.
- 855 Winham SJ, Colby CL, Freimuth RR, Wang X, Andrade M de, Huebner M, Biernacka JM (2012) SNP  
856 interaction detection with Random Forests in high-dimensional genetic data. *BMC*  
857 *Bioinformatics*, **13**, 164.
- 858 Wright MN, Ziegler A, König IR (2016) Do little interactions get lost in dark random forests? *BMC*  
859 *Bioinformatics*, **17**, 145.
- 860 Yeaman S, Whitlock MC (2011) The genetic architecture of adaptation under migration–selection  
861 balance. *Evolution*, **65**, 1897–1911.
- 862 Yoder JB, Stanton-Geddes J, Zhou P, Briskine R, Young ND, Tiffin P (2014) Genomic signature of  
863 adaptation to climate in *Medicago truncatula*. *Genetics*, **196**, 1263–1275.

864 **Data accessibility**

865 Simulation data from Lotterhos & Whitlock (2015): Dryad: doi:10.5061/dryad.mh67v  
866 Supporting simulation data (coordinate files) for Lotterhos & Whitlock (2015) data provided by  
867 Wagner *et al.* (2017): Dryad: doi:10.5061/dryad.b12kk. Wolf data from Schweizer *et al.* (2016):  
868 Dryad: doi.org/10.5061/dryad.c9b25.

869

870 **Author contributions**

871 BRF and DLU conceived the study. BRF performed the analyses and wrote the manuscript.  
872 HHW contributed code. JRL, HHW, and DLU helped interpret the results and write the  
873 manuscript.

874

875 **Supporting information**

876 Forester\_Simulation\_Rcode.zip: Contains R code for data preparation and all of the methods  
877 tested.

878 Forester\_Wolf\_Rcode.zip: Contains R code for data preparation, analysis, interpretation, and  
879 plotting of the wolf data set with RDA.

880 Forester\_SI.pdf: Supplemental Figures S1-S7 and Tables S1-S7.
